# Supplementary material for: Early cancer screening surveillance in one medical center of China
Source: PeerJ journal article supplement (doi:10.7717/peerj.18179), 2024-09-27
Supplement: Raw_data_and_codes.zip [file Raw_data_and_codes.zip]

## Sheet: Sheet1
Gender	Age	Marriage	Occupation	History2	Allergy	Mfamily	Cancer	History	Surgery	Pathology1	shsmoking	Smoking	Drinking	agemp	Last1	Height	BW	Heart	HBP	HPV	TCT	GPhistory	C13	Gendo	PathologyG	Eendo	PathologyE	OB	HCVIGG1	HCVIGG2	HBSAG1	HBSAG2	HBSAB1	HBSAB2	HBEAG1	HBEAG2	HBEAB1	HBEAB2	HBCAB1	HBCAB2	AntiTP	CEA1	CEA2	CA125_1	CA125_2	CA153_1	CA153_2	CA199_1	CA199_2
2	37	2	1	2	2	1	2	2	1	2	1	2	2	3	1	166	56	56	107/71					4		6							62.62	1
1	69		1	2	2	1	2	2	1	3	1	1	1		1	175	70	58	110/55					6		6							22.03	1			0.167	1	0.011	1		5.92	1
2	69	2	1	2	2	1	2	1	1	2	1	2	2	1	2	158	55	54	133/64					3		6													0.267	1
1	44	2	1	2	2	2	2	2		3	2	1	2		1	174	75	75	120/90					4		5
1	56	2		2	2	1	2	1		3	2	2			1	169	53	59	108/64					3		6					1035	1					0.003	1	0.01	1
2	52	2	1	2	1	2	2	2	1	3	2	2	2	1	1	156	47	56	124/78					4		6							>1000	1					0.01	1
2	55	2	1	2	2	1	2	2		3	2	2	2	1	1	160	54.5	86	113/66	2	1	1		6		4							48.11	1
1	54							2										74	93/62														41.17	1					0.01	1
2	31	2		2	2	1	2	1		3	2	2	2	3	1	164	64	61	107/59		1	1		6		5					8868	1					0.033	1	0.007	1
1	41	2	1	2	1	2	2	2		3	2	2	2		2	175	86.5	79	105/76					6		6							18.74	1
2	48	2	1	2	2	1	2	2		3	2	2	2	3	1	160	50	83	121/65		1	1		6		6							>1000	1					0.007	1
1	51	2	1	2	2	2	2	2		3	2	2	1			170	64	69	93/61					4		6							85.13	1
2	56	3	1	2	1	1	2	2	1	3	2	2	2	1	1	165	59.5	65	130/65					5		6							87.38	1
1	50	2	1	2	2	2	2	2		3	1	1	1			176	86	70	143/95					6		5							195	1					0.984	1
2	46	2	1	2	2	1	2	1			2	2	1	1		163	55	78	107/73					6									>1000	1
1	46	2	1	2	2	1	2	2		3	1	1	1		1	179	84	78	119/79					4									504.5	1					0.054	1
2	42	2	1	2	2	1	2	2	1	3	1	2	2	3	1	160	46	59	108/67			1		4		6							>1000	1			0.17	1	0.007	1				32.14	1	32.14	1
1	60	2	3	2	2	1	2	1	1	3	1	1	2		1	175	73	49	132/76					3		5							407.2	1					0.007	1
2	54	2	3	2	2	1	2	2		3	1	2	1	1	1	170	78	79	135/68			1		3		5							>1000	1			0.351	1	0.007	1
1	56	2	1	2	2	1	2	1	1	3	1	1	1		1	177	65	79	135/68					3		5							>1000	1					0.007	1
1	45		1	2	2	1	2	2	1	3	2	2	1		1	170		66	129/79					6		6							312.3	1			0.521	1	0.007	1
2	57	2		2	2	1	2	2		3	2	2	2	3	1	170	78	91	140/84			1		6		5							>1000	1			0.038	1	0.007	1
1	57	2		2	2	1		1	1			1	2			163.5	65.5	80	154/87					6		5							>1000	1
1	46	2	1	2	2	1	1	1	1	1	1	2	2		1	165	54	55	110/72					6							431.1	1					0.003	1	0.006	1
1	52		1		2	1		2			2	2	1		1	173	68	69	98/63														97.93	1
2	53		3		2	2	2	2		3	2	2	2	1	1	159	50.2	60	109/69			1		3									978	1
1	35		1	2	2	1	2	2	1	3		1	1		1	180	78	66	135/68					6		5							130.1	1			0.911	1	0.006	1
2	48	2	1	2	2	1	2	2		3	2	2	2	1	1	154	49.5	64	135/68					6		6
1	40	2	1	2	2	2	2	2		3	2	2	1		1	175	75	55
2	62	4		2	2	1	2	1	1	3	1	2	2	1	2	156	72	79	135/68			1		3		6													0.677	1
1	47		1	2	2	1	2	2		3	1	1	1		1	188	86	51	137/78
1	35	1	1	2	2	1	2	2		3	2	2	2		1	175	79	79	135/68					6		6							60.78	1
1	25		1	2	2	1	2	2		3	2	2	2		1	181	72.5	67	135/68					6		6							64.92	1
2	70	2	2	2	2	1	2	2		3	2	2	2	1	1	156	48	58	135/68			1		3		6							23.09	1			0.696	1	0.007	1
1	37	2	1	2	2	1	2	2		3	2	2	1		1	175	69																50.97	1
2	30	2	1	2	1	1	2	2	1	3	2	2	2	3	1	172	65					2
2	57	2	1		1	1	2	2		3	2	2	2	1	1	168	65	56	142/74			1
2	63	2		2	2	2	2	2	1	3	2	2	2	1	1	162	70	66	135/68					4		5		1
1	63	2	2	1	1	2	2	1			1	2	2		1			57	135/68					3																								38.37	1
2	65		1		2	2	2	2	1		1	2	2	1	1	165	62	70	144/73														28.88	1					0.011	1
2	43	2	1	2	2	1	2	2	1	2	1	2	2	1	1	162	50	83	129/79					6		6							>1000	1			0.076	1	0.006	1
2	55	2	1	2	2	1	2	2		3	2	2	2	1	1	160	54.5	69	124/73					4		5							82.65	1			0.792	1	0.006	1
2	39	2	1	2	2	1	1	2	1		2	2	2	3	1	163	60.2	78	124/76					6		5							226.7	1					0.006	1
2	56		4	2	2	1	2	2	1	3	2	2	2	1	2	160	60	64	135/68					6		6							10.88	1					0.006	1
1	53	2	1	2	2	2	2	1			2	2	2		1	175	82	56						4		5					2942	1					0.013	1	0.007	1
2	54	2	1	2	2	1	2	2	1		2	2	2	1	1	160	56	56	135/68					6		6							49.28	1					0.11	1
1	62	2	1	2	2	2	1	2	1	1	2	2	2		1	172	73	69	110/63					6	2	5	4						13.66	1
1	66	2	1	2	2	1	2	2	1	2	2	1	2		1	172	60	55
2	64	2	1	2	2	2	2	1	1	2	2	2	2	1	1	152	55	61				1
2	60	2	1	2	1	1	2	2	1		1	2	2	1	1	159	70	65	126/86			1											15.16	1					0.007	1
1	36	2	1	2	2	1	2	2		3	1	1	1		1	180	66	67	121/76					6		5							353.5	1					0.007	1
1	61							2																				1
2	61							2														1
2	56	2	2	2	1	1		2	1	2	1	2	2	1	1	159	50	71	108/74					6		6																						51.54	1
2	35	2	1	2	2	1	2	2		3	1	2	1	3	1	167	52	66	135/68					6		6							171.1	1
2	32	2	4	2	2	1	2	1	1	3	1	2	1	3	1	172	87	72	150/92										58.05	1			95.07	1
1	33	2	1	2	2	2	1	1	1	1	1	1	1		1	183	110	65	126/75												3155	1					0.003	1	0.007	1
1	41	2	1	2	2	1	2	2	1	3	1	1	1			175	75	88	135/68					5		5							55.96	1
2	33	1	1	2	2	1	2	2	1	2	2	2	2	3	1	166	55					2
1	60	2	1	2	2	1	2	2		3	2	2	2		1	180	80
1	36							2
1	43	2	1	2	2	1	2	1		3	2	2	1		1	170	65	63	140/90					6		5							100.7	1					0.04	1
2	42	2	1	2	2	2	2	2	1	2	2	2	1	3	1	160	59	67	109/74			1		6		5							>1000	1			0.311	1	0.007	1
2	35	2	1	2	2	2	2	2	1	3	2	2	2	3	1	153	46	89	113/72			1											592.2	1
1	37	2	1	2	2	2	2	2	1	2	2	2	2		1	176	71	59	113/73					6		6					8782	1					0.003	1	0.007	1
1	39	1	1	2	2	1	2	1		3	2	2	1		1	176	85	74	130/86					6		6					6518	1					0.003	1	0.007	1
1	45							2
1	38							2
1	56	2	1	2	2	2	2	1		3		2	1		1	172	82	57	136/83					6		5
2	45	2	1	2	1	1	1	2	1	1	2	2	1	2	1	171	55	59	115/75					4		5
1	31	2	1	2	2	1	2	2		3	2	2	2		2	170	72	53	106/55					5									>1000	1
2	37							2														1
1	36	2	1	2	2	2	2	2		3	1	1	2		1	170	70	82	126/72					6		5							282.6	1			0.064	1	0.007	1
1	36	2	1	2	2	1	2	2		3	2	2	1		1	177	76	69	121/70					6		6							438.5	1
1	45	2	1	2	2	1	2	2		3	1	1	2		1	170	73	67	103/65					6		5					140.9	1					0.184	1	0.007	1
1	50	2	1	2	2	1	2	1	1	3	1	1	2		1	175	76	92	137/95					3		5							42.1	1					0.007	1
2	48	2		2	2	1	2	2		3	1	2	2	3	1	161	68	62	106/68			1		3		6													0.007	1
2	56	2	3	2	2	1	2	2	1	3	2	2	2	1	1	156	56	68	126/79			1		3		5							138.1	1			0.275	1	0.007	1
2	66	2	1	2	2	2	2	2	1	3	2	2	2	1	2	165	80					1
2	51	2	1	2	2	1	2	2	1	2	1	2	2	1	1	150	54.6	71	116/79			1		6									104	1					0.589	1
2	37	2	1	2	2	1	2	2		3	2	2	1	3	1	168	56	79	100/68					6		6
1	36	2	1	2	1	1	2	1	1	3	1	1	1		1	170	66	78	116/80
2	32	2		2	2	1	2	2	1	3	1	2	2	3		165	61					1		5		6							88.96	1
2	30	2		2	2	1	2	2		3	1	1	2	3	1	163	52							6		5							>1000	1					0.016	1
2	57	2	4	2	2	1	2	1	1	3	1	2	2	1	1	159	66							6		6							199.4	1			0.814	1	0.007	1
1	57	2	1	2	2	2	2	2		3	1	2	1		2	174	80							6		6							36.26	1			1	1	0.007	1
2	44	2	1	2	2	2	2	2	1	2	2	2	2	3	1	156	60	70	99/55			1		4		6							>1000	1
2	53	2		2	2	1	2	1	1		2	2	2	1	1	155	57	59	120/72			1		6		6					389.2	1			484.7	1			0.007	1
2	60	2	2	2	2	1	2	1	1	3	2	2	2	1	1	158.5	53.3	57	104/65			1		4		6					8274	1					0.414	1	0.007	1
1	41	2	1	2	2	1	2	2		3	1	1	1		1	178	91	63	122/68					4		5							269.6	1					0.009	1
1	47	2	1		2	1	2	1	1	3	1	1	1		1	176	87							4		5							>1000	1			0.413	1	0.007	1
2	56							2
1	55							2																									213.7	1
2	45	2	1	2	1	1	2	2	1	3	1	2	2	3	1	152	52	83	127/87			1		6		6
2	65	2	2	2	2	2	2	1	1		1	2	2	1	1	165	70	61	131/79			1		6		6
1	64	2	2	2	2	2	2	2	1		1	1	1		1	170	70	74	122/74					6		5
2	62	3	1	2	1	1	2	2		3	2	2	2	3	1	160	60	60	120/78			1		4		6
2	59	2	1	2	1	1	2	2	1	3	1	2	1	1	1	168	67	71	128/77			1		6		6
1	62	2	1	2	2	1	2	1	1	3	2	2	2		2	170	75	60	130/80					6		5
1	45	2	2	2	2	2	2	2		3	1	1	1		2	168	68							6
1	59	2		2	2	2	2	2		3	1	1	1		2	163	48	80	107/69					3		3
1	36	2	1	2	2	1	2	1		3	2	2	2		1	176	75	72	135/77					6		6					213.4	1					0.002	1	0.007	1
2	41	2	1	2	2	1	1	2	1	1	2	2	1	3	1	162	55	72	95/65			1		3		5							122.1	1
2	68	2	1	2	2	2	2	1	1	2	2	2	2	2	1	160	72	60	124/52			1		3		6
1	43	2	1	2	2	1	2	2	2	3	2	1	1		1	170	73	73	126/80					3		3							>10	1			0.749	1	0.874	1
2	58	2	1	2	2	1	2	2	1	2	2	2	2	1	1	165	67	62	110/74			1		3									28.78	1
1	59	2	1	2	1	1	2	2	1	3	2	2	2		1	168	79	71	124/84					3		5							778.3	1			0.97	1	0.6	1
2	31	3	1	2	2	1	2	2	1	3	2	2	1	3	1	168	58							6		6							>10	1			0.12	1	0.6	1
1	42	2	1	2	2	1	2	2	1	2	2	2	1		1	174	61	84	114/76					3		5							519.1	1
2	56	2	4	2	2	2	2	2	1	2	2	2	2	1	2	156	56	71	147/94			1		3		5
1	54	2	2	2	2	1	2	1	1	3	1	2	1		1	175	78	76	133/13					5		5
2	46	2	4	2	2	1	2	2	1	3	2	1	1	3	1	157	50	83	190/52			1				6							16.81	1
2	47	2	1	2	2	1	2	2	1	3	2	2	2	3	1	157	47	64	125/75					2	1	5							>10	1
2	34	2	1	2	1	1	2	2	1	2	2	2	2	3	1	164	51	61	118/55					6		6							98.65	1
1	56	2		2	2	1	2	2	1	2	1	1	1		1	168	63	74	132/82					3		3
1	34	2	1	2	2	2	2	2	2	3	2	2	2		1	160	69	74	134/93					6		5							11.66	1
1	37	2	1	2	2	1	2	2	1	3	2	1	1		1	177	78	61	121/63					6		6							227.9	1
1	37	2	1	2	1	1	2	2	2	3	2	2	1		1	175	90	68	133/88					4		6							39.73	1
2	42	2	4	2	2	2	2	2	1	3	2	2	2	3	1	156	51	84	119/77			1		6				1					>10	1			0.664	1	0.7	1
1	39	1	1	2	2	1	2	2	2	3	2	2	2		1	176	83	62	114/76					6		6							>10	1
2	53	2	1	2	2	1	2	2	1	3	2	2	2	1	1	145	55	61	118/62			1		6		6							537.2	1			0.667	1	0.912	1
1	55	2	1	2	2	1	2	1	1	3	2	2	2		1	165	75	76	123/82					6		5							298.1	1					0.957	1
2	53	2	1	2	2	1	2	1	1	3	2	2	2	2	1	160	61	60	122/71			1											11.4	1			0.66	1	0.6	1
2	64	2	3	1	1	1	2	1	1	2	2	2	2	1	1	171	67	69	125/73			1		4		6							93.36	1					0.16	1
1	48	2	1	2	2	1	2	2	1	2	1	1	1		1	179	92	63	129/78					6		5
1	36	2	1	2	2	2	2	2	1	3	1	1	1		1	182	60	69	115/76					6		6							>10	1			0.997	1	0.6	1
1	49	2	1	2	2	2	2	2	2	3	1	1	2		1	175	80	77	140/73					4		6							>10	1					0.8	1
1	38	2	1	2	2	2	2	2	1	2	2	1	1		1	178	85	76	144/82					6		5							12.85	1					0.6	1		7.32	1
2	55	2	1	2	1	1	2	1	1	3	2	2	1	1	1	156	58	74	158/92			1		4		6							16.33	1
1	56	2	1	2	2	1	2	2	1	3	1	2	1		1	176	73	72	117/77					3		5							>10	1			0.13	1	0.1	1
2	56	2	4	2	2	1	2	1	1	2	2	2	2	1	1	155	58	75				1		3		6							58.7	1			0.556	1	0.7	1
1	54	2	1	2	1	1	2	1	1	2	2	2	1		1	169	60	75	157/89					4		5							>10	1			0.913	1	0.6	1		5.45	1
2	30	1	1	2	2	2	2	2	2	3	2	2	2	3	1	165	51	83	112/70					6		6
2	55	2	3	2	2	1	2	1	1	3	1	2	2	1	1	155	66	82	150/86			1											24.1	1			0.161	1	0.121	1								44.59	1
1	62	2	1	1	2	1	2	2	1	3	2	2	1		1	174	72	57	160/68					3		6							3.41	1
2	38	3	4	2	2	2	2	2	1	3	2	2	2	3	1	162	55	76	126/80					6		6
1	28	2	1	2	1	1	2	2	2	3	1	2	2		1	174	77	70	119/69					6		5
2	29	2	1	2	2	1	2	2	1	2	1	2	2	3	1	162	40	87				1		6		6							>10	1			0.626	1	0.6	1
2	42	2	1	2	2	1	2	2	2	3	1	2	2	3	1	157	47	68	110/76			1		5		5
2	55	2	4	2	2	2	2	2	1	3	2	2	1	1	1	167	60	67	119/64														63.1	1					0.99	1
1	56	2	4	2	2	1	2	1	1	3	2	2	1		1	176	90	72						3		5							148.1	1
1	38	2	1	2	2	1	2	2	2	3	1	1	1		1	170	84	76	135/68					6		5							>10	1					0.177	1
2	47	2	3	2	2	1	1	2	1	1	2	2	1	1	1	162	68	64	139/77			1		3		6
2	47	2	4	2	2	1	2	2	1	2	2	2	2	3	1	161	67	69	138/83					4		6							12.8	1
2	46	2	4	2	1	1	2	2	1	2	1	2	2	3	1	154	40	64	114/74			1		3		6							775.2	1
1	71	4	3	2	2	1	2	1	2	3	2	1	1		1	174	80	68	148/76					3		5		1											0.95	1
2	27	1	3	2	2	2	2	2	2	3	2	2	2	3	1	165	80	68	98/64
1	53	2	3	2	2	2	2	1	1	3	1	1	1		1	175	80	66	135/89
2	51	2	3	2	1	2	2	2	1	3	2	2	2	1	1	158	62	51	124/74			1
1	47	2	2	1	2	2	2	1	1	3	1	2	1		2	184	90	82	146/92					3		5					4552	1					0.2	1	0.6	1
1	39	2	1	2	2	2	2	1	2	3	1	2	1		1	173	86	72	112/81					3		5							361.8	1
1	56	2	1	2	2	1	2	2	1	3	1	1	1		1	170	70	55	136/82					3		5							28.49	1			0.38	1	0.6	1
2	44	2	4	2	2	1	2	2	1	3	2	2	2	3	1	165	55	86	140/64			1		4		6
2	60	2	1	2	2	1	2	2	1	2	2	2	2	1	1	157	51	78	135/68			1		4		5							818.7	1
1	54	2	2	2	2	1	2	2	1	2	2	2	1		2	180	90	55	131/87					3		5							28.33	1										26.15	1	26.15	1
2	36	2	1	1	2	1	2	1	1	2	2	2	2	3	1	167	56	64	123/82			1		6		6							>10	1			0.811	1	0.6	1
2	35	1	1	2	2	2	2	2	1	2	1	2	2	3	1	161	58	59	170/68					4		6
2	56	2	1	2	1	2	2	1	1	2	1	2	2	1	1	160	72	93	118/81
1	48	2	2	2	2	1	2	1	2	3	2	2	1		1	172	76	64	97/62					6		5
2	48	2	4	2	2	2	2	2	2	3	2	2	2	3	2	158	60	66	123/69			1		6		5
2	59	2		2	2	1	2	1	2	3	1	1	1	1	2	167	73	54	126/72			1		5		5
1	56	2	1	2	2	1	2	1	1	3	2	2	2		1	175	75	71	144/84					6		5
1	38	2	1	2	2	1	2	2	2	2	1	1	1		1	165	50	71	129/92					6		6
2	47	2	3	2	2	2	2	1	1	3	2	2	2	3	1	163	85	83	128/75			1
2	64	4	3	2	2	2	2	2	1	3	2	2	2	1	1	160	60	63	118/70			1		4
2	63	2	4	2	2	2	2	1	1	2	2	2	2	1	1	158	67	67	147/72			1		6		5					1487	1					0.889	1	0.6	1
1	62	2	2	2	2	1	2	2	1	3	1	1	1		1	170	60	66	132/67					4		5							9.4	1
1	39	2	3	2	2	1	2	2	2	3	1	1	2		1	171	69	66	190/64					6		5							>10	1			0.915	1	0.8	1
2	66	2	1	1	1	1	2	1	1	2	2	2	2	2	1	163	65	79	135/68					3		6			5.84	1			41.1	1			0.3	1	0.7	1
2	71							2										70	121/67		1	1
1	50							2										67	141/85
2	43							2										60	180/74		1	1
1	49							2
2	43							2														1
1	68							2										57	156/88
2	67							2										57	168/84									1
2	64							2										73	115/71		1	1
2	70							2										71	124/75		1	1
2	52	2	1	2	2	2	2	2	1	3	2	2	2	1	1	160	62	65	139/86			1		4		6							24.1	1
1	53	2	3	2	2	1	2	2	2	3	1	1	1		1	177	75	63	122/72					6		6							31.5	1
2	33	2	1	2	2	1	2	2	1	3	1	2	2	3	1	170	52	82	116/81	1		1											275.1	1
2	50	2	1	2	2	1	2	2	1	3	2	2	2	1	1	156	50	68	123/74			1		4		6							72.4	1
1	55	2	1	2	2	1	2	1	1	3	1	1	1		1	180	66	71	131/81					3		6							11.96	1					0.84	1
2	38							2										59	180/54			1
2	66							2														1
2	53							2										58	121/72			1
1	55							2										73	145/93
2	62							2										63	130/76			1
1	66							2										86	133/75
2	42							2										72	116/64			1
1	44							2										87	134/89
2	41							2										85	131/73
1	68							2										64	133/76
2	65							2										62	122/77			1
1	38							2										56	124/71
2	65							2														1
1	70							2										51	122/76																							5.51	1
1	62							2										56	133/65
1	65		1	2	2	1	2	1	1	3	2	2	2		1	168	78	79	128/75					6		6
2	68		4	2	2	1	2	1	2	3	2	2	2	1	1	162	62	79	145/69					6		6							19.76	1			0.66	1	0.6	1
1	42							2										64	111/77
2	41	2	3	2	2	2	1	2	1	1	2	2	2	3	1	162	42.5	72				1											>10	1			0.249	1	0.7	1				87.71	1
1	29	2	3	2	2	1	2	2	2	3	2	1	2		2	180	86	73	170/83					6		5
2	56							2																3		6							128.3	1
1	44	2	1	2	2	1	2	2	1	3	1	1	1		1	175	75	82	120/73					3		6													0.6	1
2	35	2	1	2	2	1	1	2	1	1	2	2	2	3	1	168	60	76	112/69														>10	1								48.3	1	221.3	1	221.3	1	126.1	1
2	44	2	1	2	1	1	1	1	1	1	2	2	1	2	1	164	65	54	158/86			1		4		6							168.2	1					0.525	1
2	54	2	1	2	1	1	1	2	1	1	2	2	2	1	1	162	70	89	148/93			1		6		3							589.8	1
1	56	2	1	2	2	2	2	1	2	3	1	1	1		1	170	86	55	130/77					4		6							335.4	1					0.666	1
1	59	2	1	1	2	1	2	1	2	3	1	1	1		1	170	63	53	127/68
1	68	2	1	2	2	1	2	1	1	3	2	2	2			173	90	73	141/64														532.1	1					0.11	1
2	39	2	1	2	2	1	2	2	1	3	1	2	2	3	1	172	53.5	63	170/65			1		6		6
1	60	2	3	2	2	1	2	1	1	3	2	2	1		1	170	87	75	120/79					6		5							146.7	1					0.74	1				29.39	1	29.39	1
2	59	2	3	2	2	1	2	1	2	3	2	2	1	1	1	159	59	77	130/91			1		5		3							298.4	1
1	45	2	1	2	2	2	2	1	2	3	1	1	2		1	180	78	78	117/67					5		5							42.18	1					0.19	1
2	45	2	1	2	2	1	2	2	1	3	1	2	2	3	1	160	65	65	93/58			1		6		3
1	48	2	1	2	2	2	2	2	2	3	2	2	1		1	169	72	67	133/88					4		6
2	35	2	1	2	2	1	2	2	1	2	2	2	2	3	1	162	55	60	117/72			1		6		6							44.24	1			0.7	1	0.6	1
2	59	2	2	2	1	1	2	2	2	3	1	2	2	1	1	168	47	95	124/80			1		4		6							>10	1
1	57	2	1	2	2	2	2	2	2	3	1	1	2		1	170	75	74	131/87					6		5													0.6	1
2	39	3	1	2	2	1	2	2	1	3	2	2	2	3	1	163	65	54	118/68			1		6		5							88.14	1			0.3	1	0.7	1
2	37	3	1	2	2	1	2	2	1	2	1	1	1	3	1	168	51	64	111/72			1		6		6							64.22	1
1	66	2	1	2	2	1	2	1	1	2	1	1	1		1	166	66	80	122/80					3		6							78.42	1					0.6	1
1	45	2	1	2	2	2	2	2	2	3	1	1	1		1	169	66	85	126/74					6		5
2	53	2	1	2	2	1	2	2	2	3	1	2	1	1	1	165	62	69	99/62			1											362.9	1					0.7	1
2	43	2	3	2	2	1	2	2	1	3	2	2	2	3	1	158	54	81	190/71					6		6							381.9	1			0.34	1	0.6	1
1	50	2	1	2	2	1	2	1	1	2	1	1	1		1	165	76	63	144/89					6
1	59	2	1	2	2	1	2	1	2	3	1	2	2		1	176	60	67	126/71
2	70	2	3	2	1	1	2	2	1	3	2	2	2	1	1	162	55	67	145/87			1		6		5
2	28	1	3	2	2	2	2	2	2	3	2	2	2	3	2	160	55.5	82	92/61					6		6
1	44	2	1	2	2	1	1	2	1	1	1	2	2		1	170	76	77	119/78					4		6							38.68	1
2	65	2	4	2	1	1	2	2	2	3	1	1	1	1	1	146	57	71	129/71			1		6		6
1	64	2	1	1	1	1	2	1	1	2	1	1	1		1	170	60	76	126/74					6		5							>10	1			0.828	1	0.7	1
1	65	2	1	2	2	1	2	1	1	2	1	1	1		1	174	75	65	127/71					6	2								66.9	1					0.2	1
1	52	2	1	2	2	2	2	2	2	3	2	1	2		1	179	83	72	130/64					6		5
2	74	4	2	2	2	1	2	1	2	3	2	2	2	1	1	160	78	78	158/85			1		4		5											0.818	1	0.7	1
1	40	2	1	2	2	1	2	2	1	2	2	1	1		1	180	81	68	111/78					6		5							>10	1
2	53	2	4	2	2	1	2	2	1	3	2	2	2	1	1	158	67	60	123/75			1		6		6
1	40	2	1	2	1	1	2	2	1	3	1	1	2		1	179	93	73	129/58					4		3							276	1			0.559	1	0.7	1
1	42	2	1	2	2	1	2	2	1	3	1	2	2		1	177	95	59	126/73					6		6							15.9	1			0.996	1	0.7	1
1	52	2	1	2	2	1	2	2	2	3	2	2	1		1	170	66	60	123/76					5		6
2	64	4	1	2	2	1	2	2	1	3	1	2	2	1	1	162	58	68	124/73			1		6		6							>10	1					0.968	1
1	55	2	1	2	2	1	2	2	2	3	1	1	1		1	175	80	66	126/85					6		5
2	55	2	1	2	2		1	1	1	1	1	2	2	1	1	166	90	83	127/85			1		5		5							15.4	1			0.57	1	0.7	1
2	33	2	1	2	1	1	2	2	1	3	1	2	2	3	1	160	71	83	96/67			1		6		6
1	50	1	2	2	2	1	2	2	1	3	2	1	1		1	170	65	76	140/78					6		5
2	39	1	1	2	1	2	2	2	2	3	2	2	2	3	1	165	54	57	120/72			1				6							37.6	1
1	35	2	1	2	2	1	2	2	2	3	2	1	1		1	177	77.5	74	150/67					6		5							288.7	1			0.518	1	0.7	1
2	50	2	1	2	2	1	2	2	1	3	2	2	2	3	2	160	67	50	128/75			1		6		6							>10	1					0.7	1
2	56	2	3	2	1	2	2	2	1	2	2	2	2	1	1	165	64	57	119/75			1		4		3							349.4	1			0.675	1	0.7	1
1	58	2	3	2	2	2	2	2	2	3	2	2	2		1	170	74	61	140/61					6		4							462.1	1			0.898	1	0.7	1
2	62	2	1	2	1	1	2	2	1	3	1	2	2	1	1	162	53	72	126/71			1		4		6
1	43	2	1	2	1	2	2	1	1	3	1	1	1		1	176	80	66	135/90					6		5
1	45	2	1	2	2	2	2	2	2	3	1	2	1		1	170	83	73	123/89												5.27	1					0.26	1	0.8	1
2	46	1	1	2	1	1	2	2	1	3	2	2	2	3	1	163	63	77	133/94					3		5							934	1			0.779	1	0.7	1
2	46	2		2	2	1	2	2	1	3	2	2	2	1	1	163	80	76	122/78			1		6		6							137.2	1
1	49	2	2	2	2	1	2	1	1	3	1	1	2		1	178	90	68	127/80												7666	1			2.74	1			0.7	1				41.24	1
2	45	2	1	2	2	2	1	2	1	1	2	2	2	2	1	150	52	62				1		6		6							19.58	1
2	48	2	4	2	2	1	2	2	1	3	2	2	2	3	1	160	56	72	122/74					6		6							>10	1			0.921	1	0.7	1
1	63	2	1	2	2	1	1	1	1	1	1	1	1		1	172	52.5	71	130/65					6		6							61.15	1
1	53	2	3	1	2	1	1	2	1	1	1	1	1		1	183	83	76	110/72					3		5							>10	1
1	53	2	1	2	2	1	2	2	2	3	2	1	2		1	160	66	64	127/81					4		5							57.57	1								5.4	1
2	50	2	3	2	1	2	2	2	1	3	2	2	2	3	1	162	62	67	116/74			1		3		6
2	50	1	1	2	2	1	2	1	2	3	1	1	1	1	1	157	48	56	131/68														288.2	1			0.234	1	0.7	1
1	63	2	2	2	2	1	2	1	1	3	1	2	2		2	169	65	67	131/71					6		6							32.8	1			0.891	1	0.7	1		13.95	1					97.36	1
2	47	2	4	2	2	2	2	2	1	3	1	2	2	1	1	160	59	72	126/76					3		6
2	60							2										66	128/65
1	59							2										70	140/79
1	60	2	1	2	2	2	2	1	1	3	1	2	1		1	173	94	63	148/93					6									>10	1			0.668	1	0.11	1
2	60	2	1	2	2	2	2	1	2	3	2	2	2	1	1	163	68	71	122/73			1
2	31							2								156	41	88	109/70			1											>1000	1
1	39							2																									156.6	1					0.008	1
1	36	1	1	2	2	1	2	2	2	3	2	2	2		1	175	89	72	120/75					3		6							59.27	1
2	50	2	3	2	2	1	1	2	1	2	1	2	2	2	1	164	65	76	132/79			1		3		6							959.6	1			0.743	1	0.008	1
1	50	2	1	2	2	2	2	1	2	3	1	1	1		1	176	88	81	126/82					3		6																5.49	1	90.23	1
2	23	1	5	2	2	1	2	2	2	3	2	2	2	3	1	175	63	86	117/75					6		6							234.8	1
2	70	4	4	2	2	1	2	2	1	3	1	2	2	1	1	157	62.6	62	143/89					4	2	6													0.008	1
2	53	2		2	2	1	2	2	1	3	2	2	2	3	1	164	59	70	114/75			1		6		3	2						383.3	1			0.459	1	0.008	1
2	36							2								158	59	85	118/96			1
1	46	1	1	2	2	1	2	2	2	3	1	1	1		1	178	78	76	124/80					6		5							624.9	1
2	59	2	1	2	1	1	2	2	1	2	2	2	2	1	1	163	66	73	124/79					3									564.9	1
1	58	2	1	2	2	1	2	1	2	3	2	2	1		1	169	83	73	124/79					6		5							39.21	1					0.294	1
2	55	2	1	2	2	1	2	2	2	3	1	2	2	1	1	162	60.5	65	133/84			1		4		6							53.75	1					0.008	1				52.3	1
2	50	2	1	2	2	1	2	2	2	3	2	2	2	3	1	164	58	70	119/69			1		6		5							>1000	1
1	68	2	3	2	2	2	2	1	1	3	2	1	2		1	172	88	73	151/81									1					70.26	1					0.026	1
2	70	2	3	2	2	1	2	1	1	3	1	2	2	2	1	160	52	63	121/61	1		1		4		6							554.6	1
2	35	2	1	2	2	1	2	2	2	3	2	2	1	3	1	160	55	72	117/73			1		4		6							>1000	1
2	31							2										62	99/69			1											114	1
1	43	2	1	2	2	1	2	1	2	3	1	2	1		1	175	85	70	138/85					6		5					6835	1			1.83	1			0.008	1		5.77	1
2	46	2	4	2	1	1	1	1	1	1	2	2	2	3	1	155	65	68	138/78			1		6		6					22.5	1					0.003	1	0.008	1
2	32	2	1	2	1	1	2	2	1	3	2	2	2	3	1	160	47	79	135/68			2				3							>1000	1			0.672	1	0.008	1				42.13	1
1	55	2	1	2	2	1	2	1	2	3	2	1	1		1	174	83	64	136/76					6		5	2						>1000	1
2	55	2	1	2	1	1	2	2	1	3	2	2	2	2	1	170	65	59	135/79	3		1		6		5	2						327.6	1					0.007	1
1	62	2	3	2	2	1	2	1	2	3	2	2	1		1	172	76	69	125/86					6	2	5	2
2	60	2	1	2	1	2	2	2	2	3	1	2	2	1	1	160	60	71	129/78			1		4	2	6
1	63	2	1	2	2	1	2	1	1	3	1	1	1			168	68	53	140/67					3		5	2						997.9	1					0.008	1
2	62	2	1	2	2	1	2	2	1	3	2	2	2	1	1	168	55	55	130/81			1		6	2	5	2						53.11	1														42.69	1
1	54	2	2	2	2	1	2	2	1	3	1	1	1		1	173	55	63	119/83					3	2	6							42.98	1			0.594	1	0.008	1
2	53	2	1	2	2	1	2	2	1	3	2	2	2	1	1	153	57	76	127/81			1		6	2	6
2	28	2	1	2	2	1	2	2	2	3	2	2	2	3	1	168	80	64	116/76			2		7		6							991.1	1
1	38	2	1	1	2	2	2	2	2	3	1	1	1		1	178	80	71	128/81														>1000	1					0.008	1
1	56	2	1	2	2	2	2	1	1	3	2	2	1		1	176	67	65	160/90					4	2	6							671	1					0.009	1
2	52	2	3	1	2	1	2	1	1	3	2	2	2	3	1	158	58	67	128/76			1		6		5	3						103.4	1			0.216	1	0.008	1
2	43	2	1	2	2	1	2	2	2	3	1	2	1	3	1	160	74	76	125/80			1		6		5	3				8667	1					0.003	1	0.008	1
2	63	2	1	2	2	1	2	1	1	3	2	2	2	1	1	158	67	79	111/62			1		7		6					8045	1							0.008	1
1	50	2	1	2	2	1	2	2	2	3	2	1	2		1	180	75	71	137/80					3	2	5	2						512	1
1	59	2	1	2	2	1	2	2	1	2	2	2	2		1	174	71	87	129/85																		0.039	1	0.008	1
1	52	2	1	2	2	1	2	1	2	3	1	2	1		1	180	79	61	139/89					6		5	2						433.1	1
1	41	3	1	2	2	2	1	2	1	1	2	2	1		1	168	72	69	120/66
1	37	1	1	2	2	1	2	2	1	3	1	2	1		1	170	60	59	114/69														91	1					0.008	1
1	54							2																6	2	5	2						68.56	1					0.012	1
1	46							2										69	125/82
1	57	2	3	2	2	1	2	1	1	3	2	1	1		2	173	95	56	118/74					6		5	3						581.5	1					0.261	1
1	36	2	1	2	2	1	2	2	1	3	2	1	1		1	178	83	56	128/75					6		6							100.6	1					0.301	1
2	52	2	4	2	2	1	2	2	1	2	2	2	2	3	1	160	45	67	140/85			1		4		5							150.7	1
1	49	2	1	2	2	1	2	2	1	2	2	2	1		1	183	94	67	137/80
2	31	1	1	2	2	2	2	2	1	3	2	2	2	3	1	160	51	85	113/69					6		6							>1000	1
1	47	2	1	2	2	1	2	1	2	3	2	1	1		1	175	72	50	120/80					6		3							989.2	1
2	62	2	3	2	1	1	2	2	2	3	2	2	2	1	1	154	60	67	133/71					6		5							583.3	1					0.279	1								109.3	1
1	62	2	1	2	1	1	2	1	1	3	2	2	2		1	172	75	59	138/92					6		5							307.6	1					0.636	1
2	39	2	1	1	2	2	1	2	1	1	1	2	1	3	1	170	80	82	126/87					6		3							>1000	1					0.007	1
2	53	2	1	2	2	1	2	2	1	3	1	1	2	3	1	167	62	66	129/79			1				6							33.51	1					0.007	1
1	35	2	1	2	2	1	2	2	2	3	2	2	2		1	175	78							6		6							134.4	1
2	49	2	3	2	2	1	2	2	2	3	2	2	2	3	1	165	73	77	114/67					6		6
1	36	2	1	2	2	1	2	2	1	3	1	2	2		1	180	87	73	138/92					6		6			0.038	2	0.404	2	483.5	1	0.125	2	1.59	2	1.34	2
2	55	4	4	2	2	1	1	2	1	1	2	2	2	1	1	163	56	62	129/76			1		3		6
1	54	2	1	2	2	2	2	1	2	3	2	1	1		2	182	82	70	147/98					5		6			0.046	2	0.282	2	187.5	1	0.111	2	0.791	1	0.179	1
2	55	2	1	2	2	1	2	2	2	3	2	2	2	1	2	161	59	62	138/89			1		6		6			0.038	2	0.392	2	<2.00	2	0.117	2	1.64	2	2.24	2
2	36	2	1	2	2	1	2	2	1	3	2	2	2	3	1	167	56	88	100/63			1		6		3			0.037	2	0.469	2	272.2	1	0.113	2	1.59	2	1.9	2
2	43	2	1	2	2	1	2	2	1	3	2	2	2	3	1	157	56	73	118/81					6		6							69.89	1					0.01	1
2	65	2	1	2	1	1	2	1	1	3	1	2	2	1	2	160	62.5	58	137/73			1		3		6
1	40	2	1	2	2	1	2	2	2	3	2	1	1		1	171	78	54	107/78					6		5							>1000	1			0.004	1	0.007	1
2	43	2	1	2	2	1	2	2	1	3	1	2	2	3	1	160	45	68	113/74			1		6					0.037	2	0.372	2	>1000	1	0.114	2	0.18	1	0.007	1						30.86	1
1	47	2	1	2	2	1	2	2	2	3	2	1	1		1	179	81.5	78	127/76					6									487.9	1					0.059	1
2	63	2	1	2	2	2	2	2	2	3	2	2	2	1	1	155	80	78	138/81			1		6		6
1	63	2	1	2	2	1	2	1	1	3	2	2	2		1	173	91	72	116/76					6		5
2	69	2	1	2	1	2	2	2	2	3	2	2	2	1	1	160	70
2	37	2	1	2	2	1	2	1	2	3	2	2	2	3	1	168	60	82	127/77			1		6		6			0.04	2	0.41	2	>1000	1	0.119	2	0.007	1	0.008	1
1	55	2	1	2	2	1	2	1	1	3	1	1	1		1	170	65	62	131/75					3		6			0.146	2	0.403	2	<2.00	2	0.111	2	1.63	2	2.26	2
2	53	2	3	2	2	1	2	2	1	3	1	2	2	1	1	158	56	65	127/63					3		6			0.041	2	0.348	2	<2.00	2	0.116	2	1.61	2	1.87	2
2	29	2	1	2	2	1	1	2	1	1	1	2	2	3	1	158	63	63	112/73			2		6		6			0.04	2	0.436	2	<2.00	2	0.118	2	1.68	2	2.25	2								62.45	1
2	37	2	1	2	2	1	2	2	1	3	2	2	2	3	1	157	36	93	101/61			1		6		6
1	48	2	1	2	2	1	2	2	1	3	1	2	1		1	172	73	78	117/81					6		6			0.037	2	0.364	2	<2.00	2	0.116	2	1.66	2	2.1	2
2	44	2	3	2	2	2	2	2	1	3	2	2	2	3	1	162	60	61	105/66			1		4		6							998.6	1			0.774	1	0.007	1
2	47	2	1	2	2	2	2	2	1	2	2	2	2	3	1	160	65																											195.6	1
1	38							2								173	62	52	125/75														639	1
2	32							2								170	62	70	120/70			1											>1000	1
2	33							2								172	100	70	120/80			1
2	37							2								162	48	76	110/61			1
1	35							2								172	71	75	125/72
2	35							2														1											900.1	1
2	31							2								163	57	70	120/80			1											290.8	1
2	28							2														1									0.516	2	23.02	1	0.128	2	1.68	2	2.07	2
2	32							2								163	50	87	110/60			1											73.3	1
2	32							2								162	62	72	112/86			1											546.6	1					0.008	1
2	30							2														2
2	34							2														2											197.8	1
2	27							2														1											34.6	1
2	29							2								160	69	92	105/75			1									0.433	2	<2.00	2	0.123	2	1.69	2	2.11	2
1	32							2								173	78	76	128/60												0.453	2	250.3	1	0.128	2	1.68	2	2.07	2
2	32							2																									362.7	1
2	31							2								170	68	83	112/68			1											13.7	1
2	29							2								155	43	78	113/72														>1000	1			0.345	1	0.007	1
2	26							2														2											778.5	1					0.007	1
2	28							2								162	51	82	99/63
1	41							2								173	84	58	125/73														197.3	1								7.54	1
2	62							2								163	56	67	106/69			1											>1000	1			0.797	1	0.007	1
2	44							2								161	56.5	94	142/86			1											23.65	1
1	28							2								174	82	60													0.45	2	<2.00	2	0.131	2	1.69	2	2.09	2
1	40							2																									289.3	1
2	29							2								150	42	79	101/68			2											967.1	1
2	34							2								155	47.5	80	115/75			1											28.2	1
1	35							2
2	34							2								168	60	82	105/63			1		7		6
2	27							2								170	60	75	112/85												2231	1	<2.00	2	2164	1	8.94	2	0.011	1
2	32							2								158	43	87	112/69			2											484.3	1
2	26							2								157	53	102	136/88												0.471	2	255.8	1	0.119	2	1.6	2	2.1	2
2	43							2								158	55	66	124/75			1											>1000	1					0.008	1
2	34							2								160	55	68	100/70
2	47							2								157	52.5	64	131/74			1											>1000	1					0.066	1
2	31							2								158	55	78	98/76			1											>1000	1
2	31							2								170	60	62	92/58			1											455	1
2	32							2								164	52	70	110/70			1											>1000	1
2	31							2								164	57	76	105/72			1											821.8	1					0.015	1
2	31							2								171	90																>1000	1
2	31							2														1						1
2	26							2														2
2	30							2								166	61	83	95/56			1											420.7	1
2	32							2								168	65	65	120/79			1											654	1
2	29							2								176	70	74	99/59			1											121.6	1
2	27							2								173	72	82	108/62			2											100.9	1
2	32							2								162	53	68				1											>1000	1
2	30							2														1											274.5	1
2	28							2								161	58	72	106/64			1											240.3	1
2	33							2
2	31							2								163	50	69	97/58			1											>1000	1					0.015	1
2	26							2																									44.36	1
2	28							2								163	48	68	107/64														139.8	1			0.786	1	0.008	1
2	30							2								158	60	70	108/60			1											20.62	1
2	34							2								167	52	78	90/60			1											>1000	1			0.397	1	0.008	1
2	29							2								162	63	78	106/76			1											>1000	1
2	25							2								172						2
2	36							2								158	57	78	120/80			1											321.1	1					0.008	1
2	29							2								156	52	80	90/66			2											387.8	1
2	31							2														1											158.7	1
1	36							2																							0.371	2	95.43	1	0.126	2	1.68	2	2.15	2		6.38	1
2	26							2								165	54	74	101/61														194.1	1
2	37							2								165	49	72	102/63			1									0.496	2	<2.00	2	0.138	2	1.64	2	2.11	2
2	34							2								161	60	69	111/68			1
2	33							2														1
1	45							2
1	41							2								181	90	68	120/76																				0.345	1
2	30							2								168	59	75	104/72												0.482	2	>1000	1	0.123	2	1.62	2	2.15	2
2	32							2								165	62	79	112/66			1											919.7	1			0.097	1	0.007	1
2	38							2								167	56	68	97/61			1											501.3	1					0.27	1
1	25							2										67	119/68														229.2	1
2	35							2																									34.6	1
1	31							2								165	70	75	133/74														119.8	1					0.007	1
1	35							2								180	84	83	133/84														209.2	1								5.27	1
1	34							2								171	75	88	132/88																				0.007	1
1	38							2																									285.9	1
2	47	2	1	2	2	2	2	1	1	3	2	2	2	3	1	160	57	72	106/67					4		6							131	1					0.009	1
2	53	2	1	2	2	2	2	1	1	2	2	2	2	1	1	168	82.5	65	132/75			1		6		6											0.745	1	0.008	1
1	36							2								180	90	73	161/112														74.6	1					0.451	1
2	26							2								175	63	76	118/68			2											428.3	1
2	29							2								163	50	90	117/85														165.6	1
2	26							2														2											131.9	1
1	31							2								172	80	88	129/96														>1000	1
2	58							2								163	54																14.4	1
1	39							2
2	24							2								163	55	76	128/68			2
2	37							2														1
2	47							2								160	57	92	117/72														398.4	1
2	56							2								158	60	72	102/70			1
2	27							2																									71.61	1
2	33							2								172	66	77	101/69			2											225.7	1
2	27							2								168
2	34							2								166	51	56	105/62			1											>1000	1
2	30							2								166	57	75	102/64														29.96	1
2	34							2								160	67	89	102/72			1											25.54	1
1	28							2																															0.116	1
1	27							2								175	63	85	121/79														>1000	1
2	32							2								162	63	68	110/60			1											60.31	1
2	32							2								167	58	62	120/68			1									0.74	2	273.6	1	0.129	2	1.61	2	1.95	2
2	28							2								163	48	78	102/61			1									0.441	2	<2.00	2	0.124	2	1.63	2	2.14	2
2	31							2								163	45					1
2	20							2										106	120/67														142.6	1
1	41							2								178	87	70	130/70												0.409	2	<2.00	2	0.122	2	1.25	2	0.007	1
1	37							2																									374.2	1
2	38							2																									17.49	1
1	31							2								175	72	58	110/60														>1000	1
1	32							2																									66.64	1
1	55	2	1	2	2	1	2	2	2	3	2	2	2		1	171	70	88	130/79														26.82	1			0.975	1	0.008	1
2	37	2	1	2	2	1	2	2	1	3	2	2	2	3	1	160	60	79	124/78					6		6							>1000	1
2	55	2		2	1	1	2	2	1	3	2	2	2	1	1	158	51	59	100/64			1		6		6							149	1			0.953	1	0.008	1
1	54	2		1	2	2	2	2	2	3	2	2	2		1	170	55	62	110/65					3		6							319.6	1					0.008	1		5.87	1
2	32	2	1	2	2	1	2	2	1	3	2	2	2	3	1	163	51.5	77	110/70			1		6		6							>1000	1
2	57	2	3	2	2	1	2	2	1	2	1	2	2	1	1	164	57	92	134/86			1		6		5							>1000	1
1	57	2	2	2	1	2	2	2	1	3	1	1	1		1	173	65	73	113/72					6		5							667.7	1			0.212	1	0.014	1
1	43	2	1	2	1	1	2	2	2	3	2	2	2		1	182	76.8	80	138/92					6		6							15.89	1
1	45	2	1	2	2	1	2	2	1	3	1	2	1		1	175	80	65	127/81
2	38	2	1	2	2	1	2	2	1	3	1	2	2	3	1	166	57	62	109/62					4	2								63.12	1
2	43	2	1	2	2	1	2	2	2	3	1	1	2	3	1	165	72	66	107/69														260.3	1
1	46	2	1	2	2	1	2	2	1	3	1	1	1		1	175	73	76	136/91					6	2								64.05	1			0.075	1	0.008	1
2	47	1	1	2	1	1	2	2	1	2	2	2	2	3	1	159	55	74	115/68					4	2	5	4						19.86	1
1	64	2	1	2	2	1	2	1	1	3	2	1	2		1	170	65	71	137/83					3	2	3	2
1	29	2	1	2	2	1	2	2	2	3	2	1	2		1	175	71	78	132/97														655.6	1
2	28	2	1	2	2	2	2	2	2	3	2	2	2	3	2	156	52	73	101/64			1		7		6							177.5	1
1	56	2	1	2	2	1	2	2	1	3	1	1	1		1	185	106	74	133/76					3		5	2
2	53	2	1	2	2	1	2	1	1	3	1	2	1	3	1	166	79.4	64	139/84			1		6	2	5	4						460.1	1
2	30	2	1	2	1	1	2	2	2	3	2	2	2	3	1	158	52	86	102/63					4	2	5	2						141.5	1										35.52	1
1	54	2	1	2	2	2	2	1	1	2	1	1	2		1	168	77	66	135/82					3	2	5	3						27.24	1					0.008	1
2	55	2	1	2	2	2	2	2	2	3	2	2	2	1	1	162	58	63	120/66			1		7		6
1	56	2	1	2	2	1	2	2	1	3	2	1	1		1	169	67.5	67	114/69					4	2	5	4						155.3	1			0.194	1	0.008	1
1	58	2	1	2	2	2	2	1	1	3	2	2	1		1	179	80	73	123/76					3	2	6
1	39	2	1	2	2	1	2	1	1	3	1	1	1		1	182	77	69	128/91														117.2	1
1	37	2	1	2	2	1	2	2	2	3	2	2	1		1	182	75	72	115/76					3	2
2	34	2	1	2	2	1	2	2	1	2	1	2	1	3	1	161	56	72	99/60							6							616.5	1					0.009	1								45.5	1
2	32	2	3	2	2	2	2	2	1	2	1	2	2	3	1	159	43.5	87	112/74					4		6							264.2	1			0.727	1	0.008	1
2	36	1	1	2	2	1	2	2	1	3	1	2	2	3	1	160	48.5	66	98/62					3		5	4						16.27	1
1	23	1	5	2	1	2	2	2	1	3	2	1	2		1	173	83	83	122/82					6		6							>1000	1
2	21	1	5	2	2	1	2	2	2	3	1	2	2	3	1	165	50	78	109/67			2		6	2	5	2						91.72	1
2	53	2	1	2	2	2	2	2	1	3	2	2	2	1	1	158	56	77	118/79					6	2	5	2						13.81	1
1	46	2	1	2	2	1	2	2	1	3	2	2	1		1	178	79	83	121/82					6		6							16.87	1
1	52	2	2	2	2	1	2	2	1	3	1	1	1		1	170	75.5	71	120/76					6		6
2	51	2	2	2	2	1	2	2	2	3	2	2	2	1	1	165	58	57	139/84			1		3		6							430.5	1			0.016	1	0.008	1
1	55	2	2	1	2	1	2	2	2	3	2	1	1		1	175	71	75	140/84					6	2	5	2
2	40	2	1	2	2	1	2	2	1	3	2	2	1	3	1	170	54.5	84	137/81					4	2	6							108.4	1
1	62	2	1	2	2	2	2	2	2	3	2	2	1		1	175	85	76	156/88					4	2	5	2
1	62	2	1	2	1	2	2	1	1	3	2	2	1		1	172	81	73	132/68																		0.921	1	0.009	1
2	59	3	3	2	2	1	2	1	1	2	2	1	2	1		154	52	64	126/73			1		6		5	3						594.8	1					0.008	1
2	48	2	1	2	2	2	2	2	2	3	2	2	2	3	1	159	55	62	112/68					6		5	2
1	51	1	4	2	2	1	2	1	2	3	2	1	1		1	168	75	76	140/74					4	2	5	4						115	1
1	50	2	3	2	2	1	2	1	1	3	1	1	1		1	186	98	63	143/95					6		5	2												0.008	1
2	46	2	1	2	2	1	2	2	1	3	2	2	2	3	1	161	60	74	98/56					6	2	5	4						11.34	1
1	51	2	1	2	2	1	2	2	2	3	2	2	1		1	171	73	77	132/89					4		5	2						70.34	1
1	63	2	1	2	2	1	2	2	2	3	2	1	1		1	170	64	66	140/86					3	2	5	2						46.23	1			0.748	1	0.008	1						27.01	1
2	26	2	4	2	2	1	2	2	1	3	2	2	2	3	1	163	43.5	68	119/74			1		6		6							239.7	1
2	52	1	1	2	2	1	2	2	2	3	2	2	2	1	1	157	51	78	120/67					4	2	6							>1000	1			0.013	1	0.009	1
2	46	2	1	2	2	1	2	2	2	3	2	2	2	3	1	160	63	64	124/85					3		6							339.1	1			0.009	1	0.008	1
2	53	2	1	2	2	1	2	2	1	2	1	2	2	1	1	159	62	80	137/87					4	2	6
1	59	2	1	2	2	1	2	2	2	3	1	2	1		1	172	68	85	133/84					3	2	5	4						49.97	1
1	58	2	1	2	2	1	1	2	1	1	2	2	2		1	169	58	64	123/75					6	2	5	2
2	55	2	3	2	2	1	2	1	2	3	2	2	2	1	1	160	60	116	127/73					6		5	3
2	27	2	1	2	2	1	2	1	2	3	1	2	2	3	1	165	48	74	124/82					7		6					7456	1					0.003	1	0.008	1
2	50	2	1	2	2	2	2	2	2	3	2	2	2	1	1	165	60	84	130/80					4	2
1	53	2	1	2	2	1	2	2	1	2	2	2	2		1	170	75	64	125/89					4	2								671.8	1
2	45	2	1	2	1	1	2	2	1	3	2	2	1	3	1	158	57	59	128/78					6		6							41.05	1
1	73	2	3	2	2	1	2	1	1	3	2	2	2		1	168	65	76	148/74					6		5	2						502.6	1
1	60	2	1	2	2	2	2	2	2	3	1	1	2		1	170	64	60	121/69					3	2	5	4						903.1	1			0.047	1	0.009	1
2	56	2	1	2	2	2	2	2	1	2	2	2	2	1	1	157	55	64	96/57					1	2	6							265.6	1
2	57	2	4	2	2	1	2	2	1	3	1	2	2	1	1	166	55	57	147/77					6	2	6													0.077	1
2	44	2	3	2	2	1	2	2	1	3	1	2	2	3	1	165	80	73	117/69					6		6							>1000	1
2	36	2	1	2	2	1	2	2	1	3	2	2	1	3	1	161	65	65	129/77					6		6
1	51	2	1	2	2	2	2	1	1	2	1	1	1		1	176	85.5	90	155/99					6	2	6							236.2	1					0.926	1
2	47	2	1	2	2	1	2	1	1	3	1	2	1	3	1	163	56	67	110/73					6		6							>1000	1
1	54	2	1	2	2	2	2	1	2	3	2	2	2		1	175	82	61	133/82					6		6					707.1	1					0.027	1	0.008	1
2	55	2	1	2	2	1	2	2	1	3	2	2	2	1	1	160	55	58	106/68					7		6							55.4	1					0.111	1
2	63	4	2	2	1	1	2	1	1	2	1	1	2	2	1	160	79	71	157/81					3		3	2						80.74	1			0.828	1	0.009	1
2	53	2	1	2	2	1	2	1	1	2	2	2	2	3	1	168	72.5	83	132/83					4	2	6
1	57	2	1	2	2	2	2	2	2	3	2	2	1		1	177	86	70	118/83					3		6							>1000	1					0.606	1
1	62	2	1	2	2	2	2	2	2	3	2	2	2		1	174	72	57	129/67														578.5	1			0.013	1	0.009	1
2	56	2	1	2	2	1	2	2	1	2	2	2	2	1	1	170	62	62	124/68														58.31	1					0.029	1
1	41	2	1	2	2	1	2	2	1	3	2	2	2		1	172	70	84	130/81					6	2	6							426.2	1					0.011	1
2	49	2	1	2	2	1	2	2	1	3	1	2	1	3	1	164	53	68	123/82					3		6
1	57	2	1	2	2	1	2	2	2	3	2	1	2		1	176	74	64	127/82					4	2	3	2
2	41	2	1	2	2	1	2	1	1	3	2	2	2	3	1	160	60	53	111/75					6		5	3				7923	1							0.009	1
1	53	2	1	2	2	1	2	2	2	3	2	2	1		1	173	70	65	109/73														170.2	1			0.576	1	0.009	1
2	67	2	3	2	2	1	2	1	1	3	2	2	2	1	1	161	62.5	69	150/85					3		5	2						134.5	1					0.032	1
1	39	2	1	2	2	1	2	1	2	3	2	2	2		1	177		67	134/87					6		6							107.1	1
2	42	2	1	2	1	1	2	1	1	3	2	2	2	3	1	164	50	63	115/72					6		6					312.4	1					0.003	1	0.009	1
2	65	2	4	2	1	2	2	1	1	2	2	2	2	1	1	166	70	75	143/77					4	2	5	2						303.5	1
1	66	2	3	2	2	2	2	2	1	3	2	1	1		1	178	80	72	135/81					3	2	3	2						>1000	1
1	31	1	1	2	2	1	2	2	2	3	1	1	2		1	173	77	75	120/79														443.4	1
2	55	2	1	2	2	2	2	2	2	3	1	2	2	1	1	160	50	68	138/84					4	2	6
1	33	1	1	2	2	1	2	2	2	3	2	2	1		1	173	80	94	144/91					6		5	2						16.07	1
2	55	2	1	2	1	1	2	2	1	2	2	2	2	3	1	163	68	67	133/66					3		6																		36.69	1
2	39	2	3	2	2	1	2	2	2	3	2	2	2	3	1	163	53	69	115/73					7		6							268.3	1			0.214	1	0.009	1
2	58	2	4	2	2	1	2	2	1	3	2	2	2	1	1	160	57.5	68	126/76					7		6													0.009	1
1	57	2	1	2	2	2	2	1	2	3	2	2	1		1	172	82	66	141/77					6	2	5	2
2	38	2	1	2	2	1	2	1	1	2	2	2	2	3	1	161	55	87	117/73					3		6							>1000	1			0.96	1	0.009	1
2	45	2	1	2	1	2	2	2	1	3	2	2	2	3	2	170	58	60	110/65					3		6
1	48	2	1	2	1	1	2	2	2	3	2	2	2		1	183	73	66	138/90					3	2	6
2	47	2	1	2	2	1	2	2	2	3	2	2	2	3	1	160	75	78	135/68					3		6							444.6	1
1	39	3	1	2	2	1	2	2	2	3	1	1	1		1	183	95	75	130/79					6	2	6
2	68	2	2	2	1	1	2	1	1	2	2	1	2	1	2	150	70	57	147/75					4		6																12.87	1
1	58	2	1	2	2	1	2	2	1	3	2	2	1		1	172	75	53	106/70					4		6							>1000	1					0.012	1
2	50	2	1	2	2	2	2	1	1	3	2	2	2	3	1	163	56	66	126/80					6		6
1	51	2	1	2	2	1	2	1	1	3	1	1	1		1	177	87	76	159/98					3	2	5	2
1	53	2	1	2	2	1	2	1	2	3	1	1	1		1	170	89	63	120/82					3		4	3
2	53	2	4	2	2	1	2	2	1	3	2	2	2	3	1	165	57	74	108/68	3				4	2	6
2	33	2	4	2	2	1	2	1	1	3	1	2	1	3	1	172	85	85	112/70					7		6			46.88	1			>1000	1
1	34	2	1	2	2	2	1	1	1	1	1	1	1		1	183	113	83	120/83
2	51	2	1	2	1	1	2	1	1	3	2	2	2	1	1	165	72.5	76	129/88					6		5	2						962.5	1			0.008	1	0.009	1
1	54	2	1	2	2	2	2	2	2	3	2	2	1		1	170	79	68	137/84					3	2	5	2						58.95	1					0.144	1
2	54	2	4	2	2	1	2	2	1	3	2	2	2	1	1	155	51	69	122/77					3		5	2
1	45	2	1	2	2	1	2	2	2	3	2	1	1		1	167	67	57	136/74					3		6					285.6	1					0.003	1	0.009	1
2	39	2	1	2	2	1	2	2	1	3	1	2	2	3	1	157	55	71	128/71					6		5	4						114.8	1					0.009	1
1	42	2	1	2	2	2	2	1	2	2	1	1	2			172	75	82	139/79					3	2						6663	1					0.003	1	0.009	1
2	37	2	1	2	2	1	2	1	1	3	1	2	2	3	1	163	53	56	95/58					6		6
1	46	2	1	2	2	2	2	2	2	3	1	2	1		1	173	85	72	134/95					4	2	5	2												0.009	1
1	45	2	1	2	2	2	2	2	2	3	2	1	2		1	170	74	63	125/79					6	2	5	3						236.6	1
1	27	1	1	2	2	1	2	2	1	3	2	2	2		1	178	66	74	134/85					6	2								679	1
1	57	2	1	2	2	1	2	2	2	3	2	1	2		2	173	74	67	146/84					3		5	2						368.2	1
1	46	1	1	2	2	1	2	1	1	3	2	2	2		1	174	67	81	133/71					6	2	5	4
2	46	2	1	2	2	1	2	2	2	3	2	2	2	3	1	161	60	79	135/68					4	2	6
1	51	2	1	2	2	1	2	2	2	3	2	1	1		1	177	75	92	109/63					3		6
2	55	2	1	2	2	1	2	2	1	2	2	2	2	1	1	150	65	76	105/69					5	2	5	4						111.1	1					0.01	1
1	65	2	2	2	2	2	2	1	2	3	2	1	1		1	170	80	64	159/94					3		5	2
1	62	2	1	2	2	2	2	1	1	2	2	2	1		1	177	83							3		6							279.8	1					0.01	1
1	62	2	2	2	2	2	2	1	1	3	1	1	2		1	172	60							3	2	6							131.1	1					0.009	1
2	66	2	3	2	1	1	2	1	1	3	2	2	2	1	1	155	55	77	137/89														>1000	1			0.924	1	0.009	1
2	33	2	1	2	2	1	2	2	1	3	2	2	2	3	1	153	49	70	116/76					6	2	5	4						>1000	1					0.009	1
2	57	2	4	2	2	1	2	2	2	3	2	2	2	1		167	54	66	118/66					4	2	3	2						169.3	1
1	58	2	3	2	2	1	2	1	2	3	1	1	2		1	174	74	60	102/64														47.63	1
1	33	2	1	2	2	1	2	2	2	3	2	2	1		1	170	62	73	115/69					6		6							>1000	1
1	37	2	1	2	2	1	2	2	2	3	2	2	1		1	181	73	59	125/65					6		5	2						70.49	1												27.07	1
1	47	2	1	2	2	1	2	2	2	3	2	1	2		1	175	61	55	133/70					6	2	5	2
2	51	2	1	2	2	1	2	2	2	3	2	2	2	1	1	162	62	69	116/75					6		6							676	1
2	54	2	1	2	2	1	2	2	1	2	2	2	2	1	1	155	48	48	126/80					3	2	5	3						16.74	1
2	68	2	3	2	2	2	2	1	2	3	1	2	2	1	1	160	66.5	79	135/68	1				3	2	5	2						769.3	1			0.004	1	0.009	1
1	71	2	3	2	2	1	2	2	1	3	2	1	2		1	172	67	70	144/78					4	2	5	2										0.927	1	0.009	1
2	45	2	4	2	2	1	2	2	1	3	2	2	2	3	1	162	60	87	106/55					5	2	6																		953.6	1			133.1	1
1	50	2	1	2	2	2	2	1	2	3	2	2	1		1	170	63	79	137/84					6	2	4	3						>1000	1					0.01	1
2	55	2	4	2	2	1	2	2	2	3	1	2	2	1	1	157	49	64	131/71					3		5	2
2	39	2	1	2	2	1	2	2	1	3	1	2	2	3	1	169	77	72	110/73					6		6	3						52.8	1
1	37	2	1	2	2	2	2	2	1	3	1	2	2		1	173	57	93	126/82					5	2	6					8228	1					0.005	1	0.01	1
1	34	2	1	2	2	2	2	2	1	2	1	2	2		1	174	80	73	132/85					6		6							>1000	1					0.01	1
1	39	2	1	2	2	1	2	1	2	3	1	1	1		1	173	65	55	113/59					3		6											0.003	1	0.009	1
2	54	2	1	2	2	1	2	2	1	2	2	2	2	3	1	159	59	74	131/87					6	2
2	70	2	3	2	2	2	2	1	1	2	2	2	2	1	1	160	53	67	160/80					4	2	5	4						19.34	1
2	37	2	1	2	2	1	2	2	2	3	2	2	2	3	1	166	48	76	99/69							5	2						>1000	1
1	61	2	1	2	2	2	2	2	1	3	2	1	2		1	175	80	65	122/73					3	2	1	1						14.07	1
2	61	2	1	2	2	1	2	1	1	3	2	2	2	1	1	162	58.5	67	137/74					3		6
2	36							2
2	63	1	1	2	2	2	2	2	1	3	1	2	2	1	1	163	53	70	110/68	2		1	1	6	2	3	2						>1000	1
1	58	2	3	2	2	2	2	2	1		1	1	2		1	178	85	71	125/71				2	5	2	6
1	56	2	2	2	2	2	2	1	1	3	2	2	2		1	180	100	70	168/90				1	6	2	5	2						793.2	1			0.486	1	0.007	1
1	67	2	1	2	2	2	2	1	1	3	2	2	1		1	170	67	67	137/88				2	3		6
2	68	2		2	2	2	2	2	1	3	2	2	2	1	1	157	72	57	160/79			1	2	3		3	2						257.2	1
2	39	2	1	2	2	2	2	2	1	2	2	2	2	3	1	158	55.5	57	111/64		1	1	2	6		6							72.48	1			0.704	1	0.006	1
2	61	2	2	2	2	1	1	1	1	1	1	2	2	1	1	160	69	79	135/68			1	1	6	2	3	2
1	41	2	1	2	2	1	2	2	2	3	2	1	2		1	162	51						2	3	2	6							>1000	1					0.01	1
2	53	2	1	2	2	2	2	1	1	2	1	2	2	2	2	165	53	65	130/75	1	2	1	2	6	2	5	2				7450	1					0.323	1	0.006	1								37.23	1
1	64	2	2	2	2	2	2	2	2	3	1	1	1		1	167	60	83	130/79				2										16.29	1					0.007	1
2	65	2	2	2	2	2	2	1	1	3	1	2	2	2	1	158	58	63	136/67				2	6	2	5	2						28.21	1					0.006	1		5.31	1
1	59	2	2	2	2	1	2	2	2	3	1	1	1		1	174	69	58	107/58				2	3	2	6							>1000	1			0.373	1	0.006	1
2	44	2	1	2	2	1	2	2	1	3	2	2	2	3	1	155	44	59	142/81			1	1	6		6							298.2	1
1	63	4	1	2	2	2	2	2	1	3	2	1	1		1	175	73	51	139/85				1	4	2								>1000	1					0.007	1
1	56	2	1	2	1	2	2	1	2	3	2	1	1		1	171	81	78	120/82				1	6	2	3	4						187.9	1
1	35	2	1	2	2	1	2	2	2	3	1	1	1		1	174	65	69	119/68				2	6		6							>1000	1
2	37	2	1	2	1	1	2	2	1	3	2	2	2	3	1	160	50	76	100/64				1	6		5	2						93.85	1										48.58	1
1	46	2	1	2	1	1	2	1	2	3	2	1	1		1	177	82	61	135/81				1	3	2	5	2				6549	1					0.002	1	0.007	1
2	55	2	3	2	2	1	2	2	1	3	2	2	2	3	1	159	56	58	139/83	1	1	1	2	3	2	5	2
2	49	3	1	2	2	1	2	2	2	3	2	2	2	3	1	157	52	77	95/58			2	1	4	2	3	2						13.56	1
1	48	2	1	2	2	1	2	1	1	3	2	2	2		1	182	75	68	150/95				2	6	2	6
1	42	2	1	2	2	1	2	2	1	3	2	1	1		1	180	80	58	131/81														>1000	1
1	67	2	2	2	2	2	2	2	2	3	2	1	1		2	180	75	72	183/84				1	6	2	3	2										0.09	1	< 0.01	1
2	69	2	2	2	2	2	2	1	2	3	2	2	2	1	1	152	55	67	160/74			1	2	4	2	5	3						852.95	1			0.08	1	0.01	1
2	49	2	1	2	2	1	2	2	1	3	1	2	2	3	1	163	55							6		6			148.1	1			104.52	1														60.32	1
1	57	2	1	2	2	1	2	2	1	2	2	1	1		1	174	80	53	119/56				1	6	2	5	2
2	64	2	3	2	2	2	2	1	1	2	1	1	2	1	1	153	56	68	103/62			1	1	5	2	6							800.5	1
1	38	2	1	2	2	1	2	2	2	3	1	1	1		1	178	63	70	112/84				1	6		6							27.53	1
2	65	2	1	2	2	1	2	2	1	3	2	2	2	1	1	158	62	68	141/75					3		3	2						>1000	1					0.08	1
2	32	2	1	2	2	1	2	2	1	2	2	2	2	3	1	168	90	68	125/73			1	1	4	2	6							698.08	1
2	41	2	3	2	2	1	2	2	1	3	2	2	2	3	1	158	43	94	112/70			1	1	4	2	6							13.85	1
1	74	2	3	2	2	1	2	1	1	3	2	2	2		1	171	70	73	135/84				1	6	2	5	2
2	67	2	3	2	2	1	2	2	1	3	1	2	2	2	1	155	74	64	161/95				1	3	2
2	43	2	1	2	2	2	2	2	1	3	2	2	1	3	1	170	71	62	119/67			1	1	4	2	6							28.87	1
2	51	2	1	2	2	2	2	2	2	3	2	2	2	1	1	165	62	77	115/76			1	2	6	2	6							37.91	1
1	54	2	1	2	2	1	2	2	1	2	2	2	1		1	170	80	74	135/91				1	3	2	5	4						260	1
2	46	2	1	1	2	1	2	2	1	3	2	2	1	3	1	163	58	71	110/75			1	1	3	2	5	2
2	60	2	1	2	1	2	2	2	1	2	2	2	2	1	1	163	68																441.8	1
1	60	2	1	2	2	1	2	1	2	3	2	1	1		1	169	77	81	107/77
2	49	2	1	2	2	1	2	2	2	3	2	2	2	3	1	160	47						2	3	2	6							115.48	1					0.37	1
1	59	4	1	2	2	2	2	1	2	3	2	2	1		1	175	80	66	198/100				2	3	2	5	2
2	48	2	1	2	2	1	2	2	1	3	2	2	2	3	1	162	81	74	117/65			1	2	4	2	3	2						>1000	1
2	37	2	1	2	2	1	2	2	2	3	2	2	1	3	1	173	70	78	117/74			1	1	6		6							>1000	1
1	36	2	1	2	2	1	2	2	1	3	2	1	1		1	174	66	74	109/68				1	6		6							>1000	1
1	65	2	3	2	2	2	1	2	1	1	2	2	2		1	175	57	75	118/74				1	7		6
2	32	2	3	2	2	1	2	2	2	3	2	2	2	3	1	165	46	80	107/73				1	7		6
1	67	2	3	2	2	2	2	2	1	3	2	2	1		1	178	80	63	121/70					3	2	3	4						681.4	1
2	67	2	3	2	1	1	2	1	1	3	2	2	2	1	1	154	54	75	146/90		1		1	7		6							>1000	1			0.91	1	0.007	1
1	45	2	1	2	2	1	2	2	2	3	1	2	1		1	170	69	72	130/74				1	3	2	6							512.63	1
2	44	2	3	2	1	1	2	2	1	3	2	2	2	3	2	160	65	67	118/75			1	1	6		6							45.83	1
1	46	2	1	2	2	1	2	2	2	3	1	1	1		1	170	63	67	117/73				2	4	2	5	2						201.98	1
1	64	2	1	2	2	2	2	2	2	3	2	2	2		1	167	82	74	137/83				1	4	2	5	2
1	53	2	1	2	1	2	2	2	1	2	1	1	2		1	164	75	56	126/78				1	3	2	5	2										0.44	1	0.04	1
1	68	2	3	2	2	1	2	1	2	3	2	1	2		2	170	76	52	151/72				1	3	2	6							325.19	1
2	65	2	3	2	2	1	2	1	2	3	2	2	2	1	2	168	68	75	160/82			1	2	3	2	5	2				7660	1					< 0.01	1	0.02	1
1	61	2	2	2	2	1	2	2	1	3	1	1	1		2	168	54	71	134/71				1	3	2	5	4
1	45							2															1	7		6
1	31							2															1	7		6							131.17	1
1	47							2															1	7		6
1	65	2	1	1	2	2	2	1	1	2	2	2	2		1	175	62.5	72	112/63				1	6	2	5	3						962.68	1			0.16	1	0.16	1
2	58	2	1	1	1	1	2	2	1	3	2	2	2	1	1	157	62	57	114/62			1	1	4	2	5	4
2	50	2	1	2	2	1	2	2	2	3	1	2	2	1	1	160	47	75	111/63			1		7		6							924.95	1					0.37	1
1	53	2	1	2	2	2	2	2	2	3	1	1	1		1	170	64	80	101/64														76.19	1
2	46	2	3	2	2	2	2	1	1	2	1	2	2	3	1	163	68.5	84	140/82			1				5	3				3902	1					0.05	1	0.02	1
2	62							2
1	68	1		2	2	2	2	2	2	3	2	2	2		1	170	60	79	135/68				2	5	2	3	2															5.87	1
1	58							2																									67.62	1			0.33	1	0.03	1
1	41	2	3	2	2	2	2	1	2	3	2	1	1		1	165	75	69	135/85				1	3		6
2	47	2	1	2	2	1	2	2	1	2	1	2	2	1	1	167	62	79	137/80			1	1	4	2	6							740.81	1			0.22	1	0.12	1
1	45	2	1	2	2	1	2	2	1	3	2	1	1		1	183	99	64	133/87				1	3	2	5	4
1	56	2	3	2	2	1	2	1	1	3	2	2	1		1	175	69	86	133/86				1	3	2	5	4
1	66	2	3	2	2	2	2	1	1	3	1	1	1		1	170	75	75	128/73				1	3	2	5	2
2	51	2	4	2	2	1	2	2	1	3	2	2	2	1	1	155	52	70	117/80		1	1	1	4	2	5	4						392.82	1
2	73	2	4	2	2	1	1	2	1	1	2	2	2	2	1	160	58	61	161/67			1	2	3	2	6							36.28	1			0.88	1	0.69	1
1	42	2	1	2	2	1	2	2	2	3	2	2	2		1	175	85	72	117/64				2	4	2	5	3				> 125	1					< 0.01	1	0.02	1
2	46	2	1	2	2	1	2	2	1	3	1	2	2	3	1	162	65	64	113/74				1	6		6							227.71	1
1	47	2	1	2	2	1	2	1	2	3	2	2	1		1	173	74	66	128/90				2	4	2	5	2						70.41	1
1	55	2	1	2	1	1	2	1	1	3	1	2	1		1	180	77	75	117/77				2	3	2	5	4						620.83	1
2	44	2	1	2	2	1	2	2	2	3	2	2	2	3	1	154	46	59	97/63			1	2	3		6							23.02	1
1	50	2	1	2	2	2	2	2	2	3	1	1	1		1	168	86	56	135/85				1	6		5	3
2	45	2	1	2	2	1	2	2	1	3	2	2	2	1	1	167	61						1	7		6											0.02	1	0.02	1
1	48	2	1	2	1	1	2	1	1	3	1	2	1		1	183	100						2										673.08	1					0.06	1
1	47	2	4	2	2	1	2	1	1	3	1	1	1		1	175	85	66	174/110				2	4	2	5	2
2	67	2	3	2	1	1	2	1	1	3	1	2	2	1	1	160	63	79	150/79			1	1	3		6
1	54	2	1	2	2	1	2	1	2	3	1	2	1		1	180	78	69	143/89				1	6	2	6							475.05	1
2	30							2																									>1000	1
2	22							2																									26.7	1
2	38							2
2	37							2																									511.9	1
1	39							2																									826.09	1
2	33							2																									761.59	1
1	37							2
2	32							2																									473.74	1
2	27							2																									>1000	1
2	45							2																									16.6	1
2	35							2																									869.8	1
2	35							2																									30.58	1
1	36							2
2	32							2																									712.32	1
2	32							2																									>1000	1
2	34							2																									790.85	1
2	33							2																									>1000	1
2	35							2																									660.96	1
2	39							2
2	31							2																									>1000	1
2	34							2																									250.6	1
2	33							2																									539.8	1			0.24	1	0.04	1
1	63							2
2	44							2
2	70							2
1	75							2
1	50							2
2	33							2																									57.53	1
1	42							2																															0.14	1
2	50	2	1	1	2	2	2	2	2	3	1	2	2	3	1	157	58	61	120/71														306.76	1			0.72	1	0.12	1
2	39	2	1	2	2	2	2	1	1	3	2	2	2	3	1	170	60	67	116/69	1	1	1	1	6		6					7406	1					0.48	1	0.02	1
1	58	2	1	2	2	1	2	2	2	3	2	1	2		1	173	74	67	138/83				2	4		6							251.39	1
1	57	1	1	2	2	1	2	2	1	2	2	1	1		1	175	71	52	172/90				2	5	2	5	4						>1000	1			0.09	1	0.04	1
2	48	2	4	1	1	1	2	2	1	3	2	2	2	3	1	154	40.5					1		7		6							442.78	1
2	38	2	1	2	2	1	2	2	1	3	1	2	2	3	1	156	54	91	123/84				1	6	2	6
1	39	2	1	2	2	1	2	2	1	3	2	2	2		1	174	77	90	119/80					6		5	4						57.66	1			0.67	1	0.31	1
2	39	2		2	2	2	2	2	2	3	2	2	2	3	1	155.7	55	67	106/63		1	1	2	3	2								45.76	1			0.37	1	0.02	1
1	51	2	1	2	2	2	2	1	2	3	2	2	1		1	175	80	56	147/87				1	6	2	4	3						812.32	1			0.5	1	0.13	1
1	49	2	1	2	2	2	2	1	2	3	2	1	1		1	170	72	74	135/89				1	3	2	6							171.29	1
1	50	2	1	2	2	2	1	2	1	1	2	2	1		1	169	72
1	49	2	1	2	1	1	2	1	2	3	1	2	1		1	178	71	81	125/76					6	2	6							>1000	1			0.807	1	0.008	1
2	46	2	1	2	2	1	2	2	1	3	1	2	2	3	1	162	55	63	133/78			1	2	6		5	4
1	37	2	1	1	1	1	2	2	1	3	1	1	1		1	173	68	59	114/66				1	6	2	6							>1000	1			0.29	1	0.06	1
1	36	2	1	2	2	2	2	2	1	3	1	1	1		1	174	67	55	118/70				1	6	2	5	2						>1000	1
2	35	2	1	2	2	1	2	2	1	2	1	1	1	3	1	155	45	68	118/71	1	1	1	1	6		5	4
2	58	2		2	2	2	2	1	1	2	2	2	2	1	1	156	56					1	1	4	2
1	56	2	2	2	2	1	2	1	1	3	1	2	1		1	175	76						2	3
1	63	2	3	2	1	1	2	1	2	3	2	2	1		1	172	82.5	80	154/92				2	3	2	6
2	63	2	3	2	1	2	2	2	2	3	2	2	1	1	1	158	58	70	148/78			1	1	3	2	5	2						>1000	1					0.41	1
2	39	2	1	2	2	1	2	2	2	3	2	2	1	3	1	168	50	74	108/67			1	1	3	2	6
2	43	2	1	2	2	1	2	2	1	2	2	2	2	3	2	159	59	95	124/77			2	1	6		6																		47.31	1
2	30	1	1	2	2	1	2	2	2	3	1	2	2	3	1	165	44	72	107/58			2		7		6							20.68	1
1	44	3	1	2	1	1	2	2	2	3	1	1	2		1	172	52	68	104/72														134.2	1
2	53	2	1	2	2	1	2	1	1	2	2	2	2	1	1	156	66	68	162/96	1		1	1	3		5	3
1	53	2	1	1	2	2	2	2	1	3	2	2	2		1	195	90	86	130/84				1	3		5	2
1	51	2	1	2	2	2	2	1	1	3	1	2	1		1	163	80	72	123/79				1	6	2	3	2		0.038	2	0.578	2	104	1	0.085	2	1.02	2	0.007	1
2	51	2	1	2	2	2	2	2	1	3	2	2	2	1	1	158	47	70	142/82					6		6							397.3	1					0.008	1
2	34	2		2	2	1	2	2	1	2	1	2	1	3	1	165	43.5	53	104/58			1		7		6											0.8	1	0.007	1
1	43	2	1	2	2	2	2	2	2	3	1	1	2		1	176	95	76	138/83				1	6	2	5	4						247.9	1							1
2	39	2	1	2	2	1	2	2	1	2	1	2	1	3	1	171	64	77	114/69				1	6		5	4						>1000	1
2	57	2	4	2	2	2	2	1	1	3	2	2	2	2	1	152	46	64	143/79			1	1	1	2	6							57.97	1					0.008	1
1	57	2	1	2	2	1	2	1	1	3	1	1	1		1	173	74	69	129/87				1	5	2	3	2										0.009	1	0.007	1
2	38	2	3	2	2	1	2	2	1	3	1	2	1	3	1	160	60.5	78	115/81	2		1	2	3		6							>1000	1					0.008	1
2	57	2	1	2	2	2	2	2	1	2	2	2	2	1	1	165	56							6	2	6							>1000	1			0.005	1	0.008	1
2	63	2	3	2	2	1	2	2	1	2	2	2	2	1	1	165	66	91	131/79			1	2	4	2	6													0.067	1
1	63	2	3	2	2	1	2	2	2	3	2	2	2		1	176	78	59	129/80				2	6	2	5	4						267.3	1			0.746	1	0.007	1
1	52	2	1	2	1	1	1	2	1	1	2	1	1		1	171.6	66	97	129/90				2	6	2	5	2						130.21	1
2	34	2	4	2	2	1	2	1	1	3	1	2	1	3	1	172	81.5	81	118/72			1	2						51.35	1			735.8	1
1	35	2	1	2	2	2	1	1	1	1	1	1	1		1	183	111						1	7		6					1565	1					0.002	1	0.007	1
2	42	2		2	2	2	2	2	2	3	2	2	1	3	1	166	45.5	70	109/72			1	2	6	2	6							>1000	1
2	58	2	3	2	2	1	2	2	1	3	2	1	1	1	1	162	58	86	138/80			1	1	4	2	5	2						>1000	1					0.28	1
1	48	2	2	2	2	1	2	2	2	3	1	1	1		1	175	78	74	148/83				1	3	2	5	4						93.92	1
2	71	2	3	2	2	2	2	1	1	2	2	2	2	1	1	160	53	56	152/67			1	1	6	2	6							24.8	1
1	38	2	1	2	2	1	2	2	2	3	2	2	1		1	171	70	63	131/80				1	7		6							52.44	1
2	38	2	1	2	1	1	2	2	2	3	2	2	2	3	1	166	50	70	93/61
1	62	2	1	2	2	2	1	2	1	1	2	1	2		1	175	78	62	148/75				2	6	2	3	2
2	62	2	1	2	2	1	2	2	1	3	2	2	2	1	1	162	59	68	125/75	1		1	1	7		6
2	28	1	3	2	2	2	2	2	2	3	2	2	2	3		165	80	78	110/82			2		7		6
1	54	2	3	2	2	2	2	1	1	3	1	1	1		1	175	75	66	125/80
2	53	2	3	2	2	2	2	2	1	3	2	2	2	1	1	158	62	56	113/76	1		1
1	38	2	1	2	2	1	2	2	2	3	2	2	1		1	171	70	73	135/88					6		6							70.45	1
2	69	4	1	2	2	1	2	1	1	3	1	2	1	1	1	160	73	65	156/77			1		4	2	3	2						158.9	1			0.544	1	0.009	1
2	40	3	1	2	2	1	2	2	1	2	2	2	2	3	1	167	81	76	134/81					6	2	6					5216	1					0.003	1	0.008	1				45.57	1
1	61	3	1	2	2	1	2	1	1	2	2	1	1		1	178	86	93	130/83					6	2								>1000	1			0.204	1	0.008	1
1	31	2	1	2	1	1	2	2	2	3	2	1	2		1	169	66	78	125/78					6		6							16.22	1
2	50	2	1	2	2	2	2	2	1	3	2	2	1	1	1	155	47	77	134/89			1		6		6							12.05	1
2	42	2	1	2	2	1	1	2	1	1	2	2	1	3	1	162	55	80	94/51			1		7		6							105.9	1
2	35	2	3	2	2	1	2	2	1	3	2	2	1	3	1	163	56	77	100/67					4	2	5	2						19.39	1
1	40	2	1	2	2	2	2	2	1	3	2	2	1		1	174	53	77	135/82					4	2	3	2						62.25	1
1	40	2	3	2	2	1	2	2	2	3	2	1	2		1	170	80	71	127/77														16.02	1
1	42	2	1	2	2	1	2	2	2	3	1	1	1		1	178	85	70	121/73					6	4	5	3						188.1	1					0.011	1
1	38	2	1	2	2	1	2	2	1	3	2	2	1		1	175	85	68	139/87					4		6							37.35	1
1	50	2	1	2	2	1	2	2	1	3	2	2	1		1	176	71	70	135/65					4	2	6							486.7	1					0.015	1
1	43	2	1	2	2	1	2	2	2	3	1	1	1		1	174	88	69	136/81																				0.01	1
2	73	2	1	2	2	1	2	1	2	3	2	2	2	1	1	154	50	84	113/62					4		5	5						>1000	1					0.011	1
2	39	3	1	2	1	2	2	2	1	3	2	2	2	3	1	168	60			1		1		6									938.1	1
2	51	2	1	2	1	1	2	2	1	2	2	2	2	1	1	162	52	64	117/64			2		6	2	6							40.26	1
2	28	2	1	2	2	1	2	2	2	3	2	2	1	3	1	166	67	85	122/73			2		6	2	6							50.45	1
1	32	2	1	2	2	1	2	2	1	3	2	2	1		2	182	100	71	135/82					3	2	5	2						50.96	1
1	39	2	1	1	2	2	2	2	2	3	2	2	1		1	172	73	74	133/85					5	2	6							137.6	1
1	31	2	1	2	2	1	2	1	2	3	2	2	1		1	180	81.5	64	115/74					3		6							394.5	1			0.005	1	0.007	1
2	52	2	1	2	2	1	2	1	2	3	1	2	2	1	1	160	48.5	72	107/69			1		3	2	6							>1000	1					0.007	1
2	21	1	5	2	2	1	2	2	2	3	2	2	2	3	1	163	59	64	106/71					6		5	4						250.4	1
2	57	2	4	2	2	1	2	1	1	2	2	2	2	1	1	155	56	78	149/90			1		7									886	1			0.687	1	0.009	1
1	55	2	1	2	1	1	2	1	1	2	2	2	1		1	169	75	90	143/85					6	2	6							>1000	1					0.009	1
1	48	2	1	2	2	2	2	2	2	3	2	1	1		1	173	72	59	127/75					6	2	6
2	42	2	1	2	2	1	2	2	1	3	2	2	2	3	1	165	54	54	121/75			1		6		6							>1000	1
1	53	2	1	2	2	1	2	1	1	3	2	2	2		1	180	110	64	149/82					6	2	5	4						366	1			0.711	1	0.008	1
1	53	2	1	2	2	1	1	2	1	1	2	2	2		1	168	65	73	127/73				1	4	2	5	2												0.008	1
2	41	2	3	2	2	1	2	2	1	2	2	2	2	3	1	166	50	76	108/65	1		1											95.27	1
2	38	2	3	2	2	1	2	2	1	2	2	2	2	3	1	159	49	69	106/67			1	1	6		6							>1000	1			0.341	1	0.009	1
1	29	3	3	2	2	1	2	2	2	3	1	1	2		1	180	115	85	145/88					6	2	6							>1000	1
1	58	2	3	2	2	1	2	2	1	2	2	1	1		1	168	66	64	164/78				1	3	2	5	2
2	34	2	1	2	2	2	2	2	1	2	2	2	2	3	1	172	65.5	67	107/63				2	4	2	6							129.8	1
1	49	2	1		2	2	2	2	2	3	2	1	1		2	170	70	70	136/86				1	6	2	5	2						88.93	1
1	44	2	1	2	2	1	2	1	1	3	1	1	1		2	168	45	58	123/83				1	6		6					7267	1					0.003	1	0.008	1
2	58	2	3	2	2	2	2	2	1	2	1	2	2	2	1	163	58.5	84	128/86				1	7		6
2	54	2	1	2	2	1	1	2	1	1	2	2	2	1	1	145	58.5	59	122/59			1	2										725.2	1			0.538	1	0.413	1
2	31	2	1	2	2	1	2	1	1	3	1	2	1	3	2	163	67	67	116/79			1		6		5	2				2928	1					0.003	1	0.009	1
2	38	2	1	2	1	1	2	2	1	2	1	2	1	3	1	168	65	74	138/87			1		6	2	6							486.5	1
1	45	2	1	2	2	1	2	2	2	3	2	2	1		1	171	75	71	138/74														13	1					0.35	1
2	43	2	1	2	2	1	2	2	1	3	2	2	1	3	1	161	70	78	103/71														640.2	1
1	45	2	1	2	2	2	2	1	1	3	1	1	2		1	177	70	72	99/65					6		5	2				6231	1					0.003	1	0.008	1
2	45	2	1	2	1	1	2	2	1	3	1	2	2	3	1	167	59	67	119/67														>1000	1			0.063	1	0.008	1				73.57	1
2	70	2	1	2	2	1	2	1	1	3	2	2	2	1	1	155	57	64	144/71														129.2	1
2	45	2	1	2	1	1	2	2	1	3	1	2	2	1	1	160	60	53	119/77			1		7		6																						37.7	1
2	61	2	3	2	2	1	2	2	2	3	2	2	2	1	1	162	65	64	127/66	1		1		4	2	6
1	51	2	1	2	2	2	2	2	1	3	2	2	2		1	170	70	72	143/85					6	2	3	2
1	50	2	1	2	2	2	2	1	2	3	2	1	1		1	171	67.5	79	135/68				1	6	2								>1000	1			0.005	1	0.007	1						26.54	1
1	37	1	1	2	2	1	2	2	2	3	2	2	2		1	175	97	81	139/84				2	6		6							60.29	1
2	56	2	1	2	1	1	2	1	1	3	2	2	1	1	1	156	56	60	158/87	2		1											14.24	1
2	33	2	1	2	1	1	2	2	2	3	2	2	2	3	1	167	57	77	117/74			2		6		5	2
1	36	2	1	2	2	1	2	2	2	3	2	2	2		1	178	97	77	136/82					6	2	6
1	42	2	1	2	2	2	2	2	1	3	2	1	1		1	180	90	69	117/77				2	6	2	5	2						48.53	1
1	48	2	1	2	2	1	2	2	2	3	2	2	2		1	174	77	76	122/78				1	6		5	2						286.9	1			0.907	1	0.007	1
2	39	2	1	2	2	2	2	2	1	3	2	2	2	3	2	167	63.5	92	116/75			1	1	6		6							578.4	1					0.021	1
2	40	3	1	2	1	1	2	2	1	2	1	2	1	3	1	160	53	66	104/69	2	1	1	1	6	2	6							>1000	1
1	55	2	1	2	2	2	2	1	1	2	1	1	1		1	165	67	85	108/75				2																0.07	1
2	56	2	1	2	2	1	2	2	1	2	1	2	2	1	1	155	47.5	59	112/72			1	1	7		6							112.2	1
2	68	2	1	2	2	1	2	1	1	3	1	2	2	1	2	169	73	57	134/76			1	1	6	2	6
1	73	2	2	2	2	2	2	1	2	3	1	1	1		1	175	63	64	120/73				2	6	2	5	2
1	32	2	1	2	2	1	2	2	2	3	2	2	1		1	171	72	59	111/64				1	6		6							>1000	1												26.16	1
1	58	2	1	2	2	2	2	1	1	3	2	2	1		1	175	80	67	119/72				2	3	2	5	2						53.82	1			0.977	1	0.007	1
1	53	2	1	2	2	2	2	1	2	3	2	2	1		1	175	80	68	134/77				2	3	2	5	2						157.4	1					0.007	1
1	48	2	1	2	2	2	2	2	1	2	2	2	1		1	175	80	82	122/72									1					395.4	1					0.011	1
2	32	2	4	2	2	1	2	2	1	3	2	2	2	3	1	160	62	66	102/60			1	1	6		6							>1000	1
2	47	1	1	2	2	1	2	2	2	3	2	2	2	2	1	150	40	100	115/68				1	6	2	6
1	37	2	1	2	2	1	2	2	1	3	2	2	1		1	173	67	75	127/61				1	6	2	5	2						84.33	1
1	37	2	1	2	2	1	2	2	2	3	2	2	2		1	177	80	68	118/74				1	6		6							760	1			0.896	1	0.007	1
2	37	2	1	2	2	1	2	2	2	3	2	2	2	3	1	171	56	85	122/84			2	1	6		6							905.4	1
1	71	2	3	2	2	1	2	1	1	3	2	1	2		1	162	76	81	155/85				2	3	2	5	2
2	69	2	4	2	2	1	2	1	1	3	2	2	2	1	1	153	50	64	150/76			1	2	3	2	5	2
2	47	2	1	2	1	2	2	2	2	3	2	2	2	3	1	169	55	60	123/81			1	1	6		5	2						724.5	1			0.055	1	0.007	1
1	47	2	1	2	2	1	2	2	2	3	2	2	2		1	172	68.7	58	108/61				2	3	2	5	2						609.7	1
1	39	2	1	2	2	1	1	2	1	1	2	2	1		1	170	56	68	120/78				2	6		5	2						>1000	1
1	38	2	1	2	2	1	2	1	2	3	2	2	1		1	179	88	85	125/86				1	6		6							23.48	1			0.842	1	0.007	1
2	35	2	1	2	2	1	2	2	2	3	2	2	2	3	1	158	60	74	114/74			1	2	3	2	4							130.1	1					0.148	1
2	43	2	3	2	2	2	2	2	2	3	1	2	2	3	1	160	65	70	117/75			1	1	4	2	6							51.05	1
1	46	2	3	2	2	1	2	2	1	3	1	1	1		2	168	70	69	129/89				1	6	2	6
2	50	2	1	2	2	2	2	1	1	2	2	2	1	1	1	162	66	65	158/96				1	4	2	5	2						>1000	1
1	46	1	2	2	2	1	2	1	1	3	1	1	1		1	171	82	89	137/78				1	7		6																						37.55	1
1	50	2	1	2	2	2	2	1	2	3	2	1	1		1	178	85	53	150/101				2
1	40	2	1	2	2	1	2	2	1	3	1	1	1		1	178	76.5	66	134/87				1	6		6
1	45	2	1	2	2	1	2	2	2	3	1	1	1		2	170	68	51	147/68				2	6	2	6
1	49	2	1	2	2	1	2	1	2	3	2	2	2		1	171	79	67	141/91				1	6		6							>1000	1					0.049	1
1	54	4	1	2	2	1	2	1	2	3	2	2	2		1	180	79	89	153/91				1	6		5	2				1520	1					0.294	1	0.007	1
2	43	2	1	2	2	2	2	2	1	3	1	2	2	3	1	160	48.5	71	122/76
2	23	1	1	2	2	1	2	2	1	2	2	2	2	3	1	173	54	64	98/62			2	1	4	2	6							>1000	1
2	35	2	4	2	2	1	2	2	1	3	2	1	1	3	1	180	69	76	127/77			1	1	4	2	6							142.6	1
1	44	2	1	2	2	1	2	2	2	3	1	1	1		1	178	77	66	123/86				1	3		6							>1000	1			0.626	1	0.007	1
1	59	2	2	2	2	2	2	2	1	3	1	1	1		1	180	82	71	156/98				1	6	2	5	2						244.3	1					0.009	1
2	58	2	1	2	1	2	2	2	1	3	1	2	2	1	1	162	60	62	161/81			1	1	6	2	6
2	54	2	1	2	1	2	2	1	1	2	1	2	2	1	1	158	57	63	135/80			1	1	6		5	2						470.6	1			0.019	1	0.007	1
1	54	2	1	2	2	2	2	1	2	3	2	2	1		1	173	63	56	135/81				2	6		6							18.62	1
2	66	2	2	2	2	2	2	1	1	3	2	2	2	1	2	152	61	75	160/82			1	1	3		6							693.6	1					0.008	1
2	30	2	1	2	2	1	2	2	1	3	2	2	2	3	1	166	48	64	101/66			1	1	4	2	6							>1000	1
1	34	2	1	2	2	1	2	2	2	3	2	2	2		1	186	85	55	131/82														175.7	1					0.175	1
1	58	2	1	2	2	2	2	2	2	3	1	1	1		1	170	77	81	121/80				1	7		6
2	57	2	1	2	2	2	2	2	2	3	2	2	2	1	1	150	52.5	69	121/74			1		7		6
2	36							2																7		6
2	44							2														1		7		6
1	46							2
2	38							2														1		7		6
1	50							2
2	45							2														1		7		6
1	69							2
2	68							2																7		6
2	67							2														1		7		6
1	46							2
2	42							2
2	45							2														1		7		6
1	66							2
2	66							2														1		7		6
2	67							2														1		7		6
1	63							2
1	47							2
2	79							2														1		7		6
2	46	1	1	2	2	1	2	2	2	3	1	2	2	2	1	156	90	81	143/91			2	1	6		5	2						18.82	1
1	31	2	1	2	2	1	2	1	1	3	1	1	1		2	178	60	70	118/73				2	5	2	3	2										0.003	1	0.008	1
1	60	2	3	2	2	1	2	1	2	3	1	1	2		1	169	77	69	125/83				1	4	2	5	3
2	57	2	3	2	1	2	2	2	1	3	1	2	2	1	1	160	58	64	124/73	1		1	1	4	2	5	2						>1000	1			0.981	1	0.009	1
1	41	2	3	2	1	1	2	2	1	3	1	1	1		2	174	80	80	135/84				1	6		5	4						64.06	1
2	59	2	1	2	2	1	2	2	2	3	2	2	2	1	1	165	75	71	136/85			1	1	3	2	6
2	52	2	1	2	2	1	2	2	1	2	1	2	2	1	1	165	59.5	53	111/64			1	2	4	2	6							46.95	1
2	45	2	1	2	2	1	2	2	2	3	1	2	1	3	1	160	57					1	1	4		5
2	30							2														1		7		6
2	23							2														2		7		6
2	31							2														1		7		6
1	24							2																				1
1	29							2
1	29							2
2	34							2																7		6
2	51							2														1		7		6
2	29							2														1		7		6
2	29							2																7		6
1	33							2
1	29							2
2	57	2	3	2	1	1	2	2	1	3	1	2	1	1	1	150	49	72	120/68			1	1	6	2	6							674	1					0.247	1
1	57	2	2	2	2	1	2	2	1	3	1	1	2		1	183	77	78	105/64				1	6		3	2						10.44	1
2	51	2	4	2	2	2	2	2	2	3	1	2	2	3	1	158	58			1		1	1	6	2	6							>1000	1			0.598	1	0.007	1
2	62	2	1	2	1	2	2	1	1	2	1	2	2	2	1	162	61	62	156/89				2	6	2	5	3						191.2	1					0.007	1
2	36	2	1	2	1	1	2	2	1	2	2	2	2	3	1	170	58	73	109/72			1		6		6							401.9	1
1	43	2	1	2	2	1	2	1	1	3	2	2	2		1	174	69	67	131/81				1	3	2	6
2	43	2	1	2	2	1	2	2	1	3	2	2	2	3	1	162	63	73	121/81			1	1	6		6							>1000	1			0.003	1	0.007	1
1	48	2	1	2	2	1	2	1	2	3	2	2	1		1	175	73	67					2	6		6					95.12	1					0.028	1	0.007	1
1	64	2	1	2	2	1	2	1	1	3	2	1	1		1	170	87	64					1	3	2	5	2												0.15	1
2	56	2	3	2	2	2	2	2	1	3	1	2	1	1	1	158	65	55				1	1	6		5	2
2	54	2	3	2	1	1	2	2	1	3	1	1	2	1	1	169	58	60				1	1	7		6							15.34	1
2	51	1	1	2	2	1	2	1	2	3	1	1	1	1	1	157	49	61				2	1	4	2	5	4						45.47	1			0.41	1	0.09	1
1	61	2	1	2	1	1	2	2	2	3	2	2	2		1	165	66	71					2	3	2	6							>1000	1
2	60	2	1	2	1	2	1	2	1	1	2	2	2	1	1	161	51	79				1	1	7		6
2	66	4	3	2	2	1	2	2	1	3	2	2	2	1	1	160	62	63				1	1	3	2	6
2	38	2	1	2	2	1	2	2	1	3	2	2	2	3	1	159	85							4	2	5	4						845.9	1			0.862	1	0.007	1
2	38	2	1	2	2	1	2	2	1	3	1	2	2	3	1	169	59	81					1	4	2	6							13.43	1
1	38	2	1	2	1	1	2	2	2	3	2	2	1		1	180	69	64					1	6		5	2						284.6	1
1	69							2
2	67							2														1		7		6
2	40							2														2		7		6
2	40	2	3	2	2	1	2	2	1	3	2	2	2	3	1	163	51	77				1	1	7		6							329.26	1					0.02	1
1	60	2	3	2	2	2	2	2	1	3	2	2	1		1	170	71	67					2	4	2	5	2
2	39	2	1	2	2	1	2	1	1	2	2	2	2	3	1	160	68	74				1	2	6		6					1224	1	330.8	1	129.2	1			0.008	1
1	42	2	1	2	2	2	2	2	2	3	2	1	1		1	171	80	68					1	3	2	5	2						38.67	1					0.03	1
2	54	2	1	2	2	2	2	2	1	2	2	2	1	1	1	171	65.5	83				1	2	6	2	5	2						141.1	1			0.204	1	0.008	1
1	57	2	1	2	2	2	2	1	2	3	2	2	2		1	175	72	65					1	6	2	5	4				5948	1					0.024	1	0.008	1
1	47							2
1	49	2	1	2	2	2	2	2	2	3	1	1	1		1	168	74.5	81					1	6		5	2
1	55	2	1	2	2	1	2	2	2	3	1	2	2		2	170	78	63					1	7		6
1	56	2	1	2	2	1	2	1	2	3	1	2	1		1	165	70	71					1	3	2	6
1	50							2																3	2	6							18.12	1
2	50							2																6	2	5	3						24.57	1			0.886	1	0.007	1
2	66	2	3	2	2	2	2	1	1	2	2	2	2	1	1	163	50	66		1		1	1	6		6	3						289.69	1					0.21	1
1	81	2	3	2	2	2	2	1	2	3	2	2	1		1	176	70	58					1	7		6																6.64	1
1	55	2	2	2	2	1	2	2	2	3	2	2	1		1	165	65	69					1	3	2	6							>1000	1
2	49	2	4	2	2	2	2	2	1	3	1	2	2	3	1	150	50.5	72					1	4	2	6							12.69	1
2	61							2
2	53	2	1	2	2	2	2	1	1	3	2	2	2	1	1	160	54.5	60		1		1
2	65	2	1	2	1	2	2	2	1	3	2	2	2	1	1	165	80					1	1	6		5	4						56.11	1										44.32	1
1	42	2	1	2	2	1	2	2	1	3	1	2	1		1	171	60						1	6		6							10.09	1
1	38	3	1	2	1	1	2	2	2	3	2	2	2		1	184	95						1	7		6							942.34	1										52.99	1
1	57	2	1	2	2	2	2	2	1	3	2	1	2		1	175	76.5	77					2	3		5	3						>1000	1			0.1	1	< 0.01	1
1	53	2	1	2	2	2	2	2	2	3	1	1	1		1	176	78	46					1	6		6
1	66	2	2	2	2	1	2	1	2	3	2	1	1		1	168	68	57					1	4	2	5	2						81.65	1
2	64	2	2	2	2	2	1	2	1	1	2	2	2	1	1	157	54	67					2	4	2	5	2						38.98	1
2	50	2	1	2	2	2	2	2	1	3	2	2	1	3	1	151	60.5	69				1	1	7		6							726.38	1
1	50	2	1	2	2	1	2	1	2	3	1	1	1		1	168	79	74					1	6	2	6							118.19	1			0.46	1	0.01	1
1	73	2	3	1	2	2	2	1	2	3	2	1	1		1	164	67.5	68					1	6	2	6
2	73	2	3	2	2	2	2	1	2	3	1	2	2	1	1	158.8	67.5	67					1	7		6
2	38	2	3	2	2	1	2	2	1	3	2	2	2	3	1	163	49	72					1	6		5	2						23.29	1
1	44	2	3	2	2	1	2	2	2	3	2	2	2		1	168	59	83					1	3	2	6							>1000	1
2	60	2	1	2	1	1	2	2	1	2	2	2	2	1	1	150	40	75					1	4	2	6							355	1					0.62	1
1	62	2	1	2	2	2	2	2	1	2	2	2	2		1	158	52.5	75					1	3		2	2						645.53	1					0.01	1
1	43	2	1	2	2	2	2	1	1	2	2	1	1		1	169	67.5	67					1	6	2	6							>1000	1			0.76	1	0.01	1
2	36	2	1	2	2	1	2	2	2	3	2	2	2	3	1	156	47.5	71				1	1	6		6							127.79	1
2	52	4	1	2	1	1	2	2	1	3	2	2	2	1	1	160	48	51		2		1	1	6		6							11.36	1
1	47	2	3	2	2	2	2	2	1	2	1	1	1		1	170	70						2	6		5	2
1	42	2	1	2	1	1	2	1	2	3	1	2	1		1	170	77	76					1	6	2	5	2						267.29	1					0.4	1
1	38	2	1	1	2	1	2	2	2	3	1	1	1		1	175	86	84					1	1	3	5	4
1	50	2	3	2	2	2	2	2	1	3	1	1	1		1	175	81.5	101					2	6	2	5	2						551.47	1
2	32	2	1	2	2	1	2	2	1	3	2	2	2	3	1	164	56	72				1	1	6		6							827.6	1
1	34	2	1	2	2	1	2	2	2	3	2	2	1		1	183	98.5	48					2	6		6
2	51	2	1	2	2	2	2	2	2	3	1	2	2	3	1	170	75	65					1	3		6							59.58	1
1	48	2	1	2	2	1	2	2	2	3	2	1	2		1	173	87	70					1	6	2	6
2	51	2	1	2	2	1	2	2	1	3	1	2	2	1	1	160	55.5	71				1	2	6		6
1	51	2	1	2	2	2	2	2	2	3	2	2	1		1	174	76.5	74					2	6		6							188.53	1					< 0.01	1
1	49	2	1	2	2	2	2	2	2	3	2	2	2		1	171	70	93					2										>1000	1					0.97	1
2	20							2
1	61	2	1	2	2	2	2	1	1	3	1	1	1		1	172	73.5	79					1	5	2	5	3
2	59	2	3	2	2	1	2	2	1	3	2	2	2	1	1	167	70.5					1	1	6		5	4												0.043	1
2	42	2	1	2	2	1	2	2	1	2	2	2	2	3	1	164	59.5	72				1	2	4	2	6							>1000	1			0.084	1	0.007	1
1	46	2	1	2	2	1	2	2	2	3	2	1	1		1	172	63	67					1	6		5	4
2	41	2	3	2	2	1	2	2	1	3	2	1	2	3	1	165	51.5	104				1	2	6		5	2						389.8	1
1	62							2
2	58	2	4	2	2	1	2	1	1	2	2	2	2	1	1	155	55	69				1	2	6		6							322.62	1			0.82	1	0.07	1		8.24	1
1	56	2	1	2	1	1	2	1	1	2	2	2	1		1	169	76	66					1	7		6
2	54	2	1	2	2	1	2	1	1	3	2	2	2	1	1	159	51	56				1	1	3	2	5	3
2	49	2	3	2	2	2	2	2	1	3	2	2	2	3	1	168	56.5	91				1	1	6		6							501.89	1			0.74	1	0.01	1
1	51	2	1	2	2	2	2	2	1	3	2	1	1		1	166	73	69					1	3		6							793.21	1					0.05	1
2	21	1	3	2	2	2	2	2	2	3	2	2	2	3	2	168	56.5	91					1	6		6							33.68	1
1	58	4	2	1	2	1	2	1	2	3	2	2	1		1	162	72	67					1	3	2	5	2						>1000	1			0.49	1	0.09	1
2	55	2	1	2	1	1	1	1	1	1	1	2	2	1	1	156	39	58					1	4	2								173.88	1
2	33	1	2	1	2	1	1	2	1	1	1	2	2	3	1	155	42.5	67				1	1	4	2	6
1	45	2	1	2	2	1	2	1	1	3	1	1	1		1	175	91	76					2	3	2	5	4				28.04	1							< 0.01	1
2	40	2	3	2	2	2	2	2	1	3	1	1	1	3	2	160	49	63				1	2	3	2	5	4						50.56	1
1	56	2	1	2	2	1	1	1	1	1	2	2	1		1	170	67	68						3	2	5	2															5.34	1
1	64	2	3	2	2	2	2	1	2	3	1	1	1		1	178	106	62						6	2	5	3
2	55	2	4	1	2	2	2	2	1	3	1	2	2	1	1	156	58	65				1	2	3	2	6							17.72	1			0.64	1	< 0.01	1
1	50	2	3	2	2	1	2	2	2	3	2	2	2		1	169	66	62					1	6	2	6							10.5	1								6.4	1
2	49	3	2	2		1	2	2	1	2	1	1	1	3	1	168	80	69		2		1	1	3	2	5	4						317.34	1			0.69	1	0.05	1
1	58	2	1	2	2	1	2	2	1	3	2	2	2		1	170	56.5	71					2	3	2	5	2						477.72	1
2	58	2	1	2	2	1	2	2	1	3	2	2	2	1	1	168	61	63				1	1	7		6							12.25	1
1	43	2	1	2	2	1	2	2		3	2	2	1		2	168	73	68					2	3	2	6	2						223.8	1
2	43	2	4	2	2	1	2	2	1	3	2	2	2	3	1	158	51	70		2		1	2	3	2	5	4						20.16	1														45.22	1
2	54							2																6									143.9	1			0.218	1	0.007	1
2	34	2	1	2	2	1	2	2	2	3	2	2	2	3	1	165	56	47		1		1	1	6		6							>1000	1
2	36	2	1	2	2	1	2	2	2	3	2	1	2	3	1	168	57.5	89				1	2	6	2	6
2	56	2	3	2	2	1	1	2	1	1	2	2	2	1	1	157	65	73					2	4	2	6
1	48	2	1	1	2	1	2	2	2	3	1	1	1		1	169	61.5	71					2	3	2								743.94	1			0.72	1	0.01	1
2	52	2	4	1	2	1	2	1	1	3	1	2	1	3	1	164.5	56.5							6		6							336.22	1
2	51	2	1	2	2	1	2	1	2	3	1	2	2	1	2	165	53	74				1	2	7		6					5153	1					< 0.01	1	< 0.01	1
1	66	2	2	1	2	2	2	2	1	3	2	2	1		1	170	63	72					2	6	2								>1000	1					0.02	1
2	40							2
1	46	2	1	2	2	1	2	1	1	3	2	2	1		1	185	77	66					2
2	52							2														1		7		6
2	51							2														1		7		6
1	44	2	1	2	2	1	1	2	1	1	1	1	1		1	183	97.5	75					2										>1000	1			0.58	1	0.14	1
2	46	2	3	2	1	1	2	2	1	3	2	1	1	3	1	170	57	54				1	1	7		6							>1000	1			0.9	1	0.02	1
2	50	2	3	2	2	2	2	2	1	3	2	2	1	1	1	165	51.5	77				1	1	6	2
2	34							2
1	66							2																		5
2	64	2	1	2	2	1	2	1	1	2	2	2	2	1	1	165	60	65				1	1	3	2	5	3
1	49	2	1	2	2	2	2	2	2	3	2	1	1		1	173	69	60					1	7		6
2	30							2																6		6							36.1	1
1	55	2	1	2	2	2	2	2	1	2	2	2	1		1	162	75.5	67						3		4	2						138.4	1
2	19	1	5	2	2	2	2	2	1	3	2	2	2	3	1	175	60	56															42.78	1
2	46	2	4	2	2	1	2	2	2	3	2	2	2	3	1	163	65	66				1		7		6							107.73	1					0.03	1
1	56	2	1	2	2	2	2	1	2	3	2	2	1			175	91	56					2	3	2	3	2						472.77	1
1	62							2																		5	2
1	30	2	1	2	2	2	2	2	2	3	2	2	2		1	174	78.5	74					1	6	2	6
2	46	2	4	2	2	2	2	2	1	3	1	2	1	3	1	160	46	70				1	1	3	2	5	2
1	44	2	1	2	2	2	2	2	2	3	1	1	1		1	172	77	50					2										611.81	1			0.03	1	< 0.01	1
2	45	2	3	2	2	1	2	2	1	3	2	2	2	3	1	158	53	71				1	2	3	2	5	3						130.47	1			0.78	1	0.03	1
2	41							2
2	52	3	1	2	2	1	2	2	1	3	2	2	1	1	1	164	73					1	2	3	2	5	4						>1000	1
1	68	2	3	2	1	2	2	2	1	3	2	1	1		1	170	61	69					2	3	2	5	2												0.19	1	1
2	65	2	3	2	2	2	2	2	1	3	2	2	2	1	1	153	60	75				1	1	3	2	5	2						>1000	1
1	38	1	1	2	2	2	2	2	1	2	2	2	2		1	175	64.5	71					1	6	2								>1000	1					0.33	1
2	56	2	1	2	2	1	2	2	1	2	2	2	2	3	1	164	50	68				1	2	3	2	6
2	39	2	1	2	2	2	2	1	1	3	2	2	2	3	1	164	53	83				1	1	3	2	6	3				4437	1					< 0.01	1	< 0.01	1
1	43	2	1	2	2	1	2	2	2	3	1	1	1		1	173	82	75					1	6		6
1	40	1	1	2	2	1	2	2	1	2	1	1	1		1	177	70.5	55					2	6		6							>1000	1
2	43	2	3	2	2	2	2	2	1	3	2	2	2	3	1	160	60	72		2		1	2	6	2	5	2												0.01	1
2	52	2	1	2	2	1	2	2	2	3	1	2	2	3	1	164	62.5	73				1	1	3		5	2						>1000	1
2	63	2	2	2	2	2	2	1	1	3	2	2	2	1	1	155	47.5	71				1	1	6	2	6					101.9	1					< 0.01	1	< 0.01	1
2	51	2	1	2	2	1	1	2	1	1	1	1	1	1	1	160	50	75				1	1	4	2	6							45.04	1
1	45	2	1	2	2	1	2	2	2	3	2	2	2		1	173	65	76					1	6		6
2	74	3	1	2	1	1	2	1	1	2	2	2	1	1	1	155	53.5	76					1	3	2	5							276.47	1			0.8	1	0.03	1								71.81	1
2	56	2	1	2	2	1	2	2	2	3	1	2	2	1	1	152	58	62				1	1	3		5	2						10.63	1
1	52	3	1	2	2	1	2	2	2	3	2	2	2		1	165	68	78					1	7		6							541.13	1
1	53							2
2	52	2	1	2	2	1	2	2	1	2	2	2	1	1	1	150	44	64				1	1	5	2	5	2						447.09	1			0.8	1	0.1	1
1	78	2	1	2	2	2	2	1	1	3	2	1	2		1	168	68	73					2																0.01	1
2	76	2	2	2	2	2	2	1	1	3	2	2	2	1	1	164	68	77					2										91.87	1
1	49	2	3	2	2	2	2	1	1	2	1	1	2		1	170	70	72					1	6		5	2						136.55	1
1	33							2																6		5							>1000	1			0.92	1
2	53	2	1	2	2	1	2	2	1	3	2	2	2	3	1	170	65	62					1	4	2	6
1	61	2	3	2	2	1	2	2	1	3	2	1	2		1	170	63.5	75					1	6	2
2	31	2	1	2	2	1	2	2	2	3	2	2	2	3	1	170	55	75		2	1	1	1										49.43	1
1	40	2	1	2	2	1	2	2	1	3	2	2	1		1	178	72	69					1	7		6							>1000	1
2	31	2	1	2	2	1	2	2	1	3	2	2	2	3	1	163	47.5	65		2	1	1	2																0.44	1
2	75	2	4	2	2	1	2	1	1	3	1	2	2	1	1		60	79				1	1	7		6
2	56							2																7		6
1	71	2	1	2	2	1	2	1	2	3	1	1	1		1	175	75	77					2										45.47	1			0.92	1	0.03	1		5.08	1
1	46	2	3	2	2	2	2	1	2	3	2	1	2		1	180	86	72					1	4	2	6					24.17	1					0.003	1	0.006	1
1	62	2	3	2	2	1	2	2	2	3	2	1	1		1	170	62.5	75					1	3		5	2												0.11	1
1	55	2	3	2	2	2	2	1	1	3	2	1	1		1	175	76	62					1	5	2	3	2
2	54	2	3	2	2	2	2	2	1	3	2	2	2	1	1	158	64	59		1		1	1	3		6
2	51	2	1	2	2	1	2	2	2	3	2	2	2	3	1	165	61.5	48				1	1	4	2	5	2
1	49	2	1	2	2	2	2	2	1	3	2	2	2		1	176	65	64					1	6	2	6
2	52	2	1	2	2	1	2	2	1	3	2	2	2	1	1	159	46.5	67						3		6							257.52	1
2	47	2	1	2	2	1	2	2	1	3	1	2	2	3	1	167	66	66				1		3	2	5	2						842.7	1			0.23	1	0.02	1
2	34	2	1	2	2	2	2	2	1	3	2	2	2	3	1	153	48					1	1	6	2								>1000	1					0.08	1
2	46							2															1	7		6
1	64							2																		5	2
2	48							2																4		3							581.28	1
2	33							2
2	56	2	1	2	2	1	2	2	1	2	2	2	2	1	1	160	49	67					1	6	2	6							100.48	1
1	46	4	3	2	2	2	2	2	2	3	2	1	2		1	177	93	64					1	3		6
1	48	2	1	2	2	1	2	1	2	3	2	2	1		1	165	78	67					2	5	2	6													0.07	1
1	33	2	1	2	2	1	2	2	1	3	2	1	1		1	175	57	61					2	6		6
1	17							2
1	46	2	1	2	2	1	2	2	2	3	1	2	2		1	178	92	59					1	7		6							12.68	1
1	42							2																		3	2
1	56	3	3	2	2	2	2	2	1	3	1	1	1		1	180	85	69					1	6	2	5	2
1	41	2	2	2	2	2	2	2	2	3	1	2	2		1	169	70	69					2	6		6
1	37	2	1	2	1	2	2	2	1	3	1	1	1		1	167	80	79					1	4	2	5	4
1	41	2	1	2	2	1	2	2	2	3	1	1	1		1	180	83	77					2	5	2	5	2
1	53	2	1	2	2	2	2	1	2	3	1	1	1		1	170	75	87					2	6		5	2
1	43	2	1	2	2	1	1	2	1	1	2	2	2		1	172	72.5	63					2	6		4	5
2	43	2	1	2	1	2	2	2	1	3	1	1	2	2	1	167	62	65					1	6		5	4
2	47	2	3	2	2	2	2	2	1	3	1	2	2	3	1	163	61.5	69				1	2	6		6
1	26	1	1	2	1	1	2	2	1	3	1	2	2		1	178	73	83					1	6		6							>1000	1
2	68	2	3	2	2	2	2	1	1	2	2	2	2	1	1	163	65	72
1	62	2	1	2	2	1	2	1	2	3	1	1	1		1	176	75						1	3	2	5	2												0.76	1
2	63	2	4	2	2	1	2	1	1	3	1	2	2	1	1	160	67	66		1		1	1			5	3						83.23	1
1	52	2	1	2	2	1	2	2	2	3	2	1	2		1	180	80	72					2
2	75							2																3	2	5	2						13.68	1
1	53	2	1	2	2	1	2	2	1	2	1	1	1		1	178	77	57					1	3		5	4
1	50	2	1	2	2	1	2	1	2	3	1	1	1		2	172	80	67					1	3	2	6											0.047	1	0.007	1
1	53							2																4	2
1	54							2															2	3	2	6							461.15	1
1	58	2	1	1	2	1	2	1	1	3	1	1	1		1	169	66.5	78					1	5	2	6							239.5	1					0.841	1
2	57	2	3	2	2	1	2	2	2	3	2	2	2	1	1	160	54	74				1	1	4	2	3	2						48.58	1			0.81	1	0.007	1
1	50	2	1	2	2	2	2	1	2	3	2	1	1		1	171	66.5	60					1	6									>1000	1			0.009	1	0.007	1
1	52	2	1	2	2	1	2	2	1	3	1	1	1		1	162	62	79					1	3	2	3	4
2	57	2	3	2	2	1	2	2	2	3	2	2	1	1	1	168	73	72				1	2	7		6							>1000	1			0.439	1	0.007	1
1	59	2	3	2	2	1	2	1	1	3	1	2	2		1	178	67	62					2										>1000	1					0.007	1
2	38	2	1	1	2	1	2	1	1	2	2	2	2	3	1	167	56	65				1	1	6	2								804.5	1			0.843	1	0.007	1
2	56	2	3	2	2	1	2	2	1	3	2	2	2	1	1	163	67	69				1	1	3		6							116.8	1
1	48	2	1	2	2	1	2	1	1	3	2	2	1		1	173	95	62					2	3	2	5	4
1	56	2	1	2	2	1	2	1	1	2	2	1	2		1	180	76	74					1	4	2	5	3										0.01	1	0.04	1
1	24	1	5	2	1	2	2	2	1	3	2	1	2		1	173	82.5	77															>1000	1
2	23	1	5	2	2	1	2	2	2	3	1	2	2	3	1	165	47	79						6									82.92	1
2	52							2
1	18							2																6		6							>1000	1
2	52	2	2	2	2	1	2	2	1	2	2	2	2	1	1	160	62	62	130/66			1	2	3	2								33.2	1					0.01	1
2	40	2	1	2	2	2	2	2	1	3	1	2	2	3	1	169	70	65	118/82				2	3	2	6							>1000	1
1	51	2	1	2	2	2	2	2	1	3	1	2	2		1	178	97	69	134/90				1	6	2	5	4						51.97	1					0.26	1
2	59	2	1	2	2	2	1	1	1	1	1	2	2	1	1	154	54	63	133/80				1	3	2	5	2						643.19	1
2	59	2	1	2	2	2	1	2	1	1	1	2	2	1	1	165	58.5	76	137/78	1		1	1	3	2	6
1	59	2	1	2	2	1	2	1	1	3	2	1	1		1	163	61	69	137/90				2	3	2	5	4										0.94	1	0.26	1
2	48	2	1	2	2	1	2	2	1	3	1	2	2	1	2	159	55	65	113/74			1	2	3	2	6
1	41	2	1	2	2	1	2	2	2	3	1	1	1		1	180	88	68	128/78				1	6	2	5	2						63.8	1					0.92	1
1	51	2	1	2	2	1	2	1	1	3	2	1	2		1	170	78.5	85	145/91				1	3	2	6
2	61							2
1	58	2	3	2	2	1	2	1	1	3	2	2	2		1	173	80	58	132/78				1	3	2	5	2												0.63	1
2	36	2	1	2	1	1	2	2	2	3	1	2	2	3	1	164	59.5	86	117/76			2	1	6		5	4						>1000	1					0.65	1
2	37	2	1	2	2	1	2	2	2	3	2	2	2	3	1	174	57.5	81	119/71			1	2	4	2	5	2						387.89	1
2	49	1	1	2	1	1	2	2	1	2	2	2	2	3	1	159	53	83	121/74				1	3	2	6							72.87	1
2	60	2	2	2	2	2	2	1	1	3	1	2	2	1	1	165	57	51	133/76			1	2	6	2	6							740.09	1			0.44	1	0.01	1
2	48	2	1	2	2	1	1	2	1	1	2	2	2	2	1	160	61.5	67	112/66			1		7		6							>1000	1			0.25	1	< 0.01	1
1	61							2															2	3	2	5	3
2	63							2															1	6		5	3						12.85	1					0.3	1
2	59	2	3	2	2	1	2	1	1	3	2	2	2	2	1	147	45	56	111/65			1		3	2						871.9	1					0.15	1	< 0.01	1
1	29	1	3	2	2	1	2	2	2	3	2	2	2		1	169	67.5	59	118/68				2	3	2	6							19.11	1
1	67	2	1	2	2	2	2	1	2	3	1	2	1		1	175	71	71	137/92												4905	1					0.02	1	< 0.01	1
1	58	2	1	2	2	2	2	1	2	3	2	2	1		1	168	70	61	127/77				1	3		6							12.58	1			0.8	1	0.07	1								57.61	1
2	46	2	1	2	2	1	2	2	2	3	2	2	1	3	1	162	51.5	58	139/77			1	2	3	2	6
1	55	2	3	2	2	2	2	1	1	3	1	1	1		1	172	80	63	154/89				1	4	2	5	2						127.26	1			0.09	1	< 0.01	1		6.69	1
2	55	2	3	2	2	2	2	2	1	3	1	2	2	1	1	160	56	53	108/63	1		1	2	3	2	6
1	50							2																3		5
2	53	2	3	2	2	1	1	2	1	1	2	2	2	1	1	158	49	85	132/82			1	1	3		6							673.87	1
1	50							2																6		6
2	49							2																3	2	6
2	47	3	1	2	2	1	2	2	2	3	2	2	1	3	1	165	52	65	103/70			1	1	6	2	6
1	42	2	1	2	2	1	2	2	1	3	1	1	1		1	173	71	65	122/73				2	6	2	5	2						397.1	1					0.24	1
2	54	2	1	1	2	1	2	2	1	2	1	2	2	1	1	160	45.5	63	122/65				2	3	2	5	2						>1000	1					0.73	1
2	37							2
2	41							2
2	39	2	1	2	2	1	2	2	2	3	2	2	1	3	1	179	65	68	111/64				1	4	2	5	3						117.3	1
2	39	2	1	2	2	2	2	2	1	2	2	2	2	3	1	179	54	91	111/61				2	3	2	6							>1000	1					0.026	1
1	40	2	3	2	2	1	2	2	2	3	2	2	2		1	178	65	77	119/78				1	6		6							54.6	1			0.846	1	0.006	1
1	42	2	1	2	1	1	2	1	1	3	1	1	2		1	183	110	63	133/80				1	4	2	5	2						644.9	1
2	51	2	1	2	1	1	2	1	1	3	2	2	2	1	1	156	63.5	100	156/82			1	2	6	2	6							86.37	1			0.509	1	0.006	1
1	77	2	3	2	2	2	2	1	2	3	2	1	2		2	168	67.5	75	141/68				2										>1000	1
1	44	2	1	2	1	2	2	2	2	3	2	1	1		2	175	76	76	137/87				1	6		6
2	57	2	4	2	2	2	2	2	1	2	2	2	2	1	1	156	55.5	62	97/55			1	2	3	2	6													0.97	1								47.38	1
2	30							2																6		6							>1000	1			0.85	1	0.09	1
1	48	2	1	2	2	1	2	2	2	3	2	2	2		1	172	70.5	74	118/78				1	3	2	5	4						279.8	1
2	66	2	1	2	2	1	2	1	1	3	2	2	1	1	1	162	54						2	3	2								328.78	1					0.33	1
2	51	2	1	1	1	1	2	2	1	3	2	2	2	1	1	167	65	77	132/82			1	2	3	2								164.35	1					0.89	1
1	60	2	1	2	2	2	2	2	1	3	2	1	1		1	170	80	65	126/77				2	6		5	2										0.96	1	< 0.01	1
2	63	2	3	2	1	1	2	1	1	3	2	2	2	1	1	166	80	75	179/100				1	3		5	2						>1000	1					0.04	1
2	43	2	1	2	1	1	2	2	1	3	1	2	1	3	1	160	56	71	108/62			1	2										>1000	1
2	41	2	1	2	1	1	2	2	1	3	2	2	1	3	1	167	51	61	98/58					6	2	6							19.08	1
2	34	2	3	2	2	2	2	2	1	3	2	2	2	3	1	160	51.5	88	101/64			1	1	6		6
1	35	2	1	2	2	1	2	2	2	3	2	2	2		1	176	70	72	126/82				2	6		6							18.95	1								5.72	1
1	44	2	1	2	2	2	2	2	1	3	2	2	1		2	178	105.5	87	136/83				2	6		5	2
2	44	2	1	2	2	1	2	2	1	2	1	2	2	3	1	155	52	75	130/82				2
2	48	1	1	2	1	1	2	2	2	3	2	2	2	3	1	155	47	88	127/76				1	4	2	6							348.2	1
2	24	2	3	2	2	1	2	2	1	3	2	2	2	3	1	160	71					1	1	7		6							375.81	1
1	24	2	1	2	2	2	2	2	1	2	1	2	1		1	179	131.5						1	7		6							13.94	1
1	48							2																4		6
1	42	2	1	2	2	2	2	2	2	3	2	1	1		1	174	94	71	135/88				1	6	2	3	4
2	40	2	4	2	2	2	2	2	2	3	2	2	2	3	2	160	52	79	106/64			1	2	6	2	6
1	57	2	1	2	2	1	2	2	1	2	2	1	2		1	175	60	68	115/71				1	6		6							182.43	1					0.69	1
1	45	2	1	2	2	1	2	2	1	3	2	2	1		1	172	71	59	109/68				1	4	2	6							485.16	1
2	61	2	3	2	2	1	2	1	1	2	2	1	2	1	1	154	52.5	74	134/79			1	1	6		6							69.05	1			0.72	1	0.01	1
2	71	2	3	2	2	2	2	1	1	3	1	1	1	1	1	162	62	60	123/63	2	1	1	1	3	2	6							759.48	1			0.35	1	0.05	1
1	66	2	3	2	2	2	2	1	2	3	1	1	1		1	170	72	68	120/67				1	3	2	6
2	35	2	1	2	2	2	1	2	1	1	1	2	1	3	1	162	41	76	116/68				1	6		6
2	52	2	1	2	2	2	2	2	2	3	2	2	2	3	1	163	60	79	102/61				1	3	2	5	2						51.85	1					0.03	1
1	51	2	1	2	1	1	2	2	1	2	2	1	1		2	166	65.5	68	118/74				1	3	2	5	2
2	59	2		2	2	2	2	2	2	3	2	2	1	1	1	157	71	65	134/76			1		4	2	5	2						43.74	1
1	62	2	1	2	2	2	2	2	2	3	2	2	2		1	168	60.5	65	129/84														12.58	1					0.27	1
1	58							2
1	49	2	3	2	2	2	2	1	1	3	1	1	1		2	177	75	86	150/106				2	3		5	2												0.02	1
1	48	2	1	2	2	1	2	2	1	3	1	1	1		1	175	70	65	128/80				2	3		3	2										0.84	1	< 0.01	1
2	50	2	1	2	2	1	2	2	1	2	2	2	2	1	1	169	54	78	116/79			1		3	2	5	4
1	63	2	1	1	1	1	2	1	1	2	2	2	2		1	168	75	68	135/88					4	2	6
1	64	2	3	2	2	2	2	2	1	3	1	2	2		1	168	64	57	149/76				1	4	2	5	2																					39.66	1
2	60	2	3	2	2	2	2	2	2	3	2	2	2	1	1	158	61	74	131/73			1	1	6		5	2						>1000	1
1	58	2	3	2	2	1	2	2	2	3	1	1	1		1	178	76.5	59	146/91				1	4	2	5	2
2	58	2	3	2	1	1	2	2	2	3	2	2	2	1	1	164	61.5	78	125/74		1	1	1	3		6							>1000	1			0.9	1	< 0.01	1
1	54	2	1	2	2	1	1	2	1	1	2	2	2		1	168	63	73	122/72																				0.02	1
1	55	2	1	2	1	1	1	2	1		1	2	1		1	165	64							6	2	6
1	39	2	1	2	2	1	2	2	2	3	2	2	1		1	175	78	73	119/83				1	7		6
2	62	2	3	2	2	1	2	1	1	2	1	2	2	1	1	165	51	75	135/78	1		1	2	6	2	6							34.25	1
1	39	2	1	2	2	1	2	2	1	3	1	1	1		1	172	88	72	110/70				2	6		5	2
2	52	2	1	2	2	2	2	2	1	2	2	2	2	3	1	162	55	64	138/81			1	1	4	2	5	3						657.62	1					0.34	1
1	59	2	3	2	2	1	2	2	2	3	2	1	2		2	172	82	62	123/72				1	3	2	5	2						58.9	1					0.31	1
2	52	2	1	2	1	1	2	2	1	2	2	2	2	1	1	164	41	64	126/75			1	1	7		6							>1000	1			0.04	1	< 0.01	1
2	35	2	1	2	2	1	2	2	1	3	2	2	2	3	1	158	59	81	103/66			1	1	6		6							717.03	1
2	29	2	4	2	2	1	2	2	1	3	2	2	2	3	1	161	62	82	108/58		1	1
2	50	2	4	2	2	1	2	1	1	2	2	2	2	3	1	160	62	63	133/90			1	1	4	2	6
1	52	2	1	2	2	1	2	1	2	3	2	1	1		1	173	78.5						1	3	2	5	2												0.4	1
2	43	2	1	2	2	1	2	2	2	3	1	2	2	3	1	163	62	73	111/58			2	1	6		6
1	54	2	1	2	2	1	2	2	2	3	2	2	2		1	170	62.5	59	124/74				1	3	2	6							246.4	1			0.002	1	0.006	1
2	52							2
1	31	1	1	1	1	1	2	2	2	3	1	2	2		1	175	85	76	141/93				1	6		6							32.78	1
2	66							2																4	2	6							87.99	1					0.029	1
2	62	2	2	2	1	1	2	2	2	3	2	2	2	1	1	168	48.5	91	137/69	1		1	1	4	2								>1000	1
1	39	2	1	2	2	1	1	2	1	1	1	2	2		1	180	86.5	78	169/100				1	4	2	6							>1000	1
2	32	2	3	2	2	1	2	2	2	3	2	2	2	3	1	161	55						1	6		6													0.98	1
1	58	2	1	2	2	2	2	1	1	2	2	1	1		1	170	72	57	136/64				2	3		5	2						>1000	1
2	57	2	4	2	2	1	2	2	2	3	1	2	2	1	1	163	57.5	60	138/93			1	1	3		6							63.09	1
1	60	2	1	2	2	1	2	1	2	3	2	2	1		1	172	88							3	2	6							218.17	1					< 0.01	1
2	38	2	1	2	2	1	2	2	1	3	2	2	2	3	1	167	58.5	65	111/63			1	1	6		6							816.37	1
2	34							2												1		2
1	39	2	1	2	2	2	2	1	2	3	2	2	2		1	167	72	76	117/68				1	3	2	5	3				> 125	1					0.01	1	< 0.01	1
1	40	1	1	2	2	2	2	2	2	3	2	2	1		1	178	102	72	132/82
2	58	2	3	2	2	2	2	2	1	2	2	2	2	1	1	160	60	67	133/76			1	2	3	2	6													0.07	1
2	67	2	3	2	2	1	2	1	1	2	2	2	2	1	1	152	54	80	154/73														17.6	1					0.02	1
1	25							2															1	7		6
2	23							2															1	7		6
1	47	2	3	2	2	1	2	2	1	2	2	2	1		1	172	78.5	65	129/82				1	3	2	5	2						36.88	1
2	67	2	3	2	2	1	2	1	1	2	2	2	2	1	1	167	66	72	144/72			1	2	6	2	6											0.248	1	0.007	1
1	49	2	1	2	2	1	2	1	2	3	2	2	2		1	175	73	70	133/70				1	7		6					7.56	1					0.09	1	< 0.01	1
1	50	1	3	2	2	2	2	1	2	3	1	1	1		1	181	78.5	79	138/88				2	3	2
1	51	2	3	2	2	1	2	2	2	3	1	2	1		1	165	67							3		5	4						72.26	1					0.97	1
2	57	2	3	2	2	2	1	2	1	1	1	2	2	1	2	158	60	94	180/100			1	2	6	2	6													0.15	1
1	58	2	3	2	2	2	2	1	2	3	1	1	1		1	172	73	64	118/76				2	3	2	5	2
2	35	2	1	2	2	1	2	2	1	3	2	2	2	3	1	169	53	77	107/53			1	1	4	2	6							>1000	1										46.71	1
1	47	2	1	2	2	2	2	2	2	3	1	1	1		1	175	79	67	120/74				1	3	2	6
2	47	2	3	2	2	1	2	2	1	3	1	2	2	3	1	169	63	75	110/69			1	1	3	2	6							50.61	1
2	34	2	3	2	2	1	2	2	1	3	2	2	2	3	1	168	72	63	110/59				1	6	2	6							211.36	1
1	74	2	3	2	2	2	2	1	1	3	2	2	2		1	175	75	68	145/78				2	4	2	6																						79.43	1
2	32	2	1	2	2	1	2	2	2	3	2	2	2	3	1	161.5	44	82	118/65				1	7		6
1	55	2	2	2	2	1	2	2	2	3	1	1	1		1	170	71.5	65	127/72					3	2	5	2
1	71	2	3	2	2	2	2	2	1	3	2	1	2		2	180	80	68	145/69				1	3	2	5	2
2	43	1	1	2	2	1	2	2	2	3	1	1	1	3	1	160	58.5	70	119/65				2	6		5	4						538.14	1					0.84	1
2	33	2	4	2	1	1	2	2	1	2	2	2	2	3	1	161	48.5	76	110/67			1	2	6		6							44.85	1
2	28	3		2	2	1	2	2	1	3	1	2	1	1	1	167	57	80	114/58		1	1	1	4	2	6							>1000	1
2	47	2	1	2	1	1	2	2	1	2	2	2	2	3	1	170	65	76	107/60			1	1	6		6
1	63	2	2	2	2	2	2	2	1	3	1	1	2		1	167	53.5	64	129/71				2	3	2	5	2
2	43	2	3	2	2	1	2	2	1	3	2	2	1	3	1	162	54.5	73	107/63	1	1	1	1	6	2	5	2						24.65	1
1	44	2	1	2	2	2	2	2	1	3	2	2	1		1	172	75	78	148/102				1	4	2	6							197.43	1					< 0.01	1
2	39							2																3		6
1	56	2	3	2	1	1	2	1	2	3	2	2	2		1	177	67							3	2	5	2						24.07	1
1	65	2	3	2	2	1	1	2	1	1	2	2	1		1	180	81.5	42	164/81				1	7		6							358.1	1					0.29	1
2	40	2	1	2	2	2	2	2	1	3	2	2	2	3	1	161	56	75	103/60			1		7		6							445.44	1
2	38							2																6		6							>1000	1					< 0.01	1
2	35	2	1	2	1	1	2	2	2	3	2	2	2	3	1	154	48	64	105/61			1	2	4	2	6							>1000	1			0.14	1	< 0.01	1
2	49	2	3	2	2	1	2	1	1	3	2	1	1	3	1	158.9	73.6							6		6
1	33	2	3	2	2	2	2	2	1	3	1	1	1		1	180	87.5	70	120/72
1	77							2
2	70							2
1	65	2	3	2	2	1	1	2	1	1	2	2	2		1	172	65	69	151/86				2	6	2	3	2
2	42	2	1	2	2	1	2	2	1	2	2	2	2	3	1	160	55	83	118/67			1	2	3	2	6			0.047	2	0.621	2	<2.00	2	0.083	2	1.49	2	2.23	2						31.92	1
2	41							2														1		7		6							520.3	1
1	48	2	1	2	2	1	1	1	1	2	2	2	2		1	172	88	92	144/92				2	4	2	6
1	36	2	1	2	1	2	2	2	2	3	1	1	1		1	165	61.5	61	104/69				1	6		6					2357	1					0.002	1	0.006	1
1	54	2	1	2	2	2	2	1	2	3	2	1	1		1	163	72.5	68	116/67				1	6		6
1	55	2	1	2	2	2	2	1	1	3	2	1	1		1	170	65	68	127/75				2	6	2	6							10.33	1
2	38							2														1		7		6							451	1
2	46							2																7		6							>1000	1					0.21	1
1	49							2								170	72	84	120/75														30.26	1
2	31							2																7		6							74.47	1
2	23							2																7		6							214.9	1
1	47							2
2	34							2														1		7		6							51.4	1
2	35							2																7		6							731.3	1
2	32							2								161	62	78	115/74			1		7		6							650.8	1			0.102	1	0.006	1
2	25							2														2		7		6							98.1	1
1	27							2																									74.68	1
2	38							2														1		7		6							302.3	1
2	35							2																7		6							307.6	1
2	34							2														1		7		6							978.4	1			0.124	1	0.006	1
2	41							2								168	70	66						7		6							197	1			0.8	1	0.006	1
2	30							2																7		6							13.46	1
2	40							2														1		7		6							379.6	1
2	29							2								157	47	69	92/63			2		7		6							610.6	1
2	25							2														2		7		6							>1000	1
2	22							2								158	52	68	108/69					7		6							>1000	1
2	30							2								163	51	70	120/70			1		7		6		1
2	45							2																7		6							530.2	1
1	40							2																									431.9	1
2	34							2														1		7		6							>1000	1
2	39							2														1		7		6							420.2	1
1	37							2
2	41							2														1		7		6							355.4	1			0.08	1	0.006	1
2	38							2														1		7		6							>1000	1
2	36							2														1		7		6
2	34							2														1		7		6					0.506	2	396.9	1	0.096	2	1.12	2	0.006	1
2	29							2														1		7		6							32.14	1
2	31							2														1		7		6
2	31							2																7		6					0.489	2	>1000	1	0.104	2	0.413	1	0.006	1
2	29							2														2		7		6
1	43							2								173	85	61	130/64														203.1	1								5.43	1
2	28							2												1		1											>1000	1
2	46							2														1		7		6							21.68	1
2	28							2																7		6
2	36							2								158	47.8	73	93/62			1		7		6							474.4	1
1	30							2
2	31							2														2		7		6					0.514	2	803.7	1	0.094	2	1.46	2	2.26	2
2	36							2														1		7		6							24.32	1
2	32							2														1		7		6					0.434	2	17.75	1	0.095	2	1.54	2	2.24	2
1	37							2
2	34							2														2		7		6							447.3	1
2	36							2																7		6
2	33							2														1		7		6							>1000	1
2	33							2														1		7		6							426.9	1
2	33							2														1		7		6							801.4	1					0.021	1
2	32							2														1		7		6							320	1
2	34							2														1		7		6							>1000	1														39.95	1
2	32							2														1		7		6							172	1
2	30							2																7		6							120.6	1					0.068	1
2	35							2										71	104/59					7		6							85.48	1
2	28							2														2		7		6							107	1
2	36							2								167	52.1	75	94/55			1		7		6							>1000	1			0.32	1	0.006	1
2	31							2								162	65	72	116/73			1		7		6							>1000	1
2	27							2										66	101/60					7		6
2	31							2														2		7		6							353.5	1
2	40							2																7		6							46.22	1
1	38							2										92	126/77														91.48	1								5.05	1
2	29							2								165	58					2		7		6							182.4	1
2	36							2														1		7		6					0.519	2	>1000	1	0.104	2	1.08	2	0.113	1
2	39							2														1		7		6
2	36							2														1		7		6							44.94	1
1	47							2
2	32							2																7		6							>1000	1
1	33							2																									128.9	1					0.006	1
1	37							2								180	88	80	134/81														224.7	1
1	35							2										77	116/70
1	36							2																															0.006	1
1	38							2																									103.7	1					0.658	1
2	29							2																7		6							336.5	1
2	31							2																7		6							173.1	1
2	28							2														2		7		6							114.3	1
2	26							2														2		7		6							12.25	1
2	35							2														2		7		6							251.8	1
2	29							2														2		7		6
2	36							2																7		6							33.31	1
1	30							2																							0.497	2	<2.00	2	0.091	2	1.53	2	0.157	1
2	31							2														2		7		6							>1000	1
2	34							2														1		7		6							400.4	1
2	30							2								160	45	70	110/70			1		7		6
2	33							2														1		7		6
1	43							2																															0.006	1
1	33							2								172	70	58	102/63														>1000	1
2	42							2														1		7		6							>1000	1			0.626	1	0.006	1
2	38							2														1		7		6							267.8	1					0.006	1
1	57							2
1	51							2
1	58	2	1	2	2	2	2	2	2	3	2	2	2		2	160	63	67	99/64				2	3	2	6							>1000	1
2	65	2	1	2	1	1	2	1	1	3	2	2	2	1	1	163	77.5	62	142/67			1	1	1	2	6							127.05	1					0.03	1
1	43	2	1	1	2	1	2	1	1	3	2	2	1		1	167	62	82	134/67				2	6		6					92.63	1					0.04	1	0.02	1
1	50							2										71	143/90				2	3	2	5	4						515.13	1
2	38	2	1	2	2	2	2	2	2	3	2	2	2	3	1	147	40	68	102/60			1	1	6	2	6							125.93	1
2	45							2															1	3	2	6							12.93	1					0.16	1
1	53	2	1	2	1	1	1	2	1	1	2	1	1		1	171.6	61.5	93	125/72				2	4	2	6							154.77	1
2	52							2
1	63	2	1	2	2	2	2	1	1	3	1	1	1		1	175	72.5	62	159/70														451.81	1
2	25	1	1	2	2	1	2	2	1	3	1	2	1	3	2	167	44.5	101	114/65			2	2										22.03	1
1	49	2	3	2	2	1	2	2	2	3	1	2	1		2	166	59	68	120/65				2	6	2	5	2				> 125	1					0.24	1	0.03	1
1	43	2	1	2	2	1	2	2	1	3	2	1	1		1	180	76	61	113/86														>1000	1
1	48	2	1	2	2	1	2	2	2	3	1	1	1		1	170	83	66	133/64				1	7		6							263.7	1			0.746	1	0.006	1
1	67	2	1	2	1	1	2	2	1	3	1	1	1		1	158	63	65	139/58				1	6	2	6													0.008	1
2	56	2	1	2	2	1	1	2	1	1	2	2	2	1	1	145						1	1	7		6
1	57	2	1	2	2	1	2	1	1	3	2	2	2		1	165	67	65	132/75				1	7		6							168.29	1
1	43	2	3	2	2	2	2	2	1	3	1	2	1		1	170	82.5	88	123/78				2	3	2	5	2				29.94	1					0.002	1	0.007	1
1	72	2	1	2	2	1	2	2	1	2	2	2	1		1	170	75	72	127/69												1694	1					0.002	1	0.006	1
2	70	2	2	2	2	2	2	2	1	3	2	2	2	1	2		67	77	132/83																				0.016	1
1	65	2	1	2	2	1	2	2	2	3	2	2	1		2	168	71	65	129/86					1	2	5	3
2	64	2	3	2	1	1	2	1	1	3	2	2	2	1	1	155	64	72	138/88					3	2	6
2	52	2	1	2	2	1	2	1	2	3	2	2	2	1	1	165	53.5	80	115/76			1	1	3	2
1	55	2	1	2	2	1	2	2	1	2	2	2	1		1	170	75	72	127/69				1	3	2	5	3						229.7	1
2	32							2
2	47							2
1	39							2
1	52							2										60	117/67									2					201.5	1							2
2	53							2										51	135/68			1											>1000	1							2
2	29	2	1	2	2	1	2	2	2	3	2	2	1	3	1	173	78	71	122/74			2											33.43	1							2
1	58	2	1	2	2	1	2	1	2	3		2	2		1	181	83	67	131/71				2	4	2	6							735.4	1			0.334	1	0.007	1	2
1	60							2										66	119/58				2	6		6													0.007	1	2
2	39							2										74	111/62			1	2	6		6							82.58	1							2
1	54							2										78	135/78				1	6		6							207.8	1					0.022	1	2
1	54							2										69	128/83				2	6	2	6					2255	1			1.94	1			0.01	1	2
2	51							2										68	133/81	2	1	1	1	4	2	5	4						264.3	1			0.848	1	0.007	1	2
1	50							2															1	6		5	4						34.98	1							2
1	61							2
2	59							2
1	40							2										93	117/78				2																		1
2	48							2										77	117/59				1					2					626.1	1					0.264	1	2
1	43							2
2	29	2	4	2	2	1	2	2	1	3	1	2	2	3	1	175	76				1	1	1										68.98	1							2
2	58							2										78	119/62		1	1	1					2											0.007	1	2
1	58							2										78	114/60				2					2													2
1	57							2
2	28							2
2	45							2										92	125/68			2	1	6									777.9	1							2
2	44							2													1	2
2	66							2										78	137/68	3	3	1	1	6		5	2						11.32	1			0.867	1	0.007	1	2
2	30	1	3	2	2	1	2	2	1	2	2	2	2	3	2	166	64	96	126/78				1																		2
2	29	2	1	2	2	1	2	2	1	2	1	2	2	3	1	168	65	95	125/71		1	1	1																		2
2	39							2										85	111/68				2										763.2	1							2
1	43							2										82	105/61				2																		2
2	42							2
1	51							2																																	2
1	74							2
1	63							2																		5							>1000	1					0.007	1	2
2	52							2										89	121/72			1	1	6		5	3														2
1	34							2										79	118/71				1										479.9	1							2
1	38							2										57	121/72				1	6		6							125.9	1							2
1	23							2										120		1	1																				1
1	38	2	1	2	2	1	2	2	1	3		2	1		1	177	78	60	121/65				2					2					368.6	1					0.756	1	2
1	46							2										61	130/80				2	6		6													0.007	1	2
2	38							2										70	119/74			1		6		6							81.75	1							2			59.75	1
2	56							2										99	108/72			1	1	6		6							>1000	1			0.002	1	0.007	1	2
2	53							2										75	119/73			1	1	6		6															2
2	37							2										88	125/83		1	1	2																		2
1	47							2										80	127/78				1					2					386.9	1			0.01	1	0.007	1	2
2	42							2										56	110/54	1	1	1	1										365.7	1							2
2	44							2										67	121/74			1	1	4		6															2
2	37							2										75	116/62			1											160.8	1							2
1	51							2
2	52							2										57	119/70														141.5	1			0.893	1	0.011	1
1	42							2										57	115/69				2	6		6							23.25	1							2
2	33							2																6	2	5	3						>1000	1							2
1	39							2																4	2	6							308.3	1							2
1	49	2	1	2	2	2	1	2	1			1	2		1	175	80	59	103/62				1	6		5	3														2
1	54	2	1	2	2	1	2	1	2	3		1	1		1	172	87	80	145/81				1	6		5	2						24.19	1							2
1	25	1	1	2	2	1	2	2	1	2		2	1		1	185	84	63	127/75				1	6		6	3	2													2
1	64							2																																								41.17	1
2	60							2
1	45							2															1	5	2	3	4														2
2	27							2																6									792	1							2
2	37							2																6		6
1	41							2										74	116/70				1	6	2	6															2
1	47							2																6		5	2	2					177.6	1							2
1	39							2																									69.6	1							2
1	71							2										58	154/81				2	6		5	2						268	1					0.007	1	2
1	57							2										78	141/73				2	6		5	2						44.93	1					0.125	1	2
2	39							2										70	103/58				1	6		5							72.45	1							2
2	36	2	1	2	2	2	2	2	1	2	2	2	2	3	2	158	72	72	116/76			1	2	6		6							45.04	1							2
1	36							2										86	116/74				1	6		5	2	2					41.88	1							2
2	37							2										64	123/69			1	1	6		5	2														2
1	80							2										79	112/58				1																		2			48.51	1			214	1
2	38							2										74	102/55				1	4	2	6							>1000	1			0.007	1	0.007	1	2
2	35	2	1	2	2	1	2	2	1	3	2	2	2	3	1	172	68	76	103/56			1	1	4	2	6							>1000	1			0.47	1	0.008	1	2
1	40	2	1	2	2	1	2	2	2	3		2	1		1	173	90	69	116/67				1	6		6
2	49	2	4	2	2	2	2	2	1	3	2	2	2	3	1	158.5	57	85	141/82			1	1					2					>1000	1							2
1	48	2	3	2	2	1	2	2	2	3		2	2		1	168	64	73	123/70				1					2					280.9	1							2
2	58	2	3	2	1	2	2	2	2	3	2	2	2	1	1	163	53	81	108/64				1	4	2	6
2	56							2										67	114/69			1	1	6		6							491.8	1					0.007	1	2
1	38							2										64	124/72				2	6	2	6															2
2	55	2	3	2	1	1	2	1	1	2	2	2	2	1	1	160	55	80	166/66			1	2	6									>1000	1			0.884	1	0.01	1	2
2	59	2	1	1	1	2	2	2	1	3	1	2	2	1	1	161	61	63	144/72			1	1	6		6			19.12	1			245.2	1					0.869	1	2
2	32	2	1	2	2	1	2	2	1	2	2	2	2	3	1	165	63	86	104/62			1	1	4	2	5	3						701.3	1							2
1	30							2										72	121/68									2					47.69	1							2
2	56							2										66	112/67				2
1	50							2										71	101/61				1										>1000	1			0.923	1	0.068	1	2
2	30	2	1	2	2	1	2	2	1	3	2	2	1	3	1	162	60	73	91/53			1	1					2					12.68	1							2
1	31	2	1	2	2	2	2	2	2	3		2	1		1	168	90	77	128/65				1	6		6							15.58	1							2
2	34	2	1	2	2	1	2	2	1	3	2	2	1	3	1	165	56.3	69	114/63		1	1	1																		2
2	38	2	1	2	1	2	2	2	1	3	2	2	2	3	1	164	49	69	94/54			1	1	4	2			2					>1000	1			0.018	1	0.007	1	2
1	41	2	1	2	2	1	2	1	2	3		2	2		1	173	83	70	131/74												5005	1					0.002	1	0.007	1	2
2	50	2	3	2	2	2	1	2	1	1	2	2	2	1	1	163	47.8																20.58	1			0.96	1	0.007	1	2
1	48	2	1	2	1	2	2	1	2	3		1	2		1	170	87						1
2	25	1	1	2	2	2	2	2	2	3	2	2	2	3	1	164	51																410.1	1							2
2	48	2	1	2	2	2	2	2	1	2	2	2	2	3	1	158	58						1										15.81	1			0.912	1	0.007	1	2
1	44	2	1	2	2	1	2	2	1	2		2	1		1	170	70	67	128/77				1	3	2	6							70.82	1							2
2	35	1	1	2	2	1	2	2	1	2	2	2	2	3	1	172	80	72	116/62					4	2	6		2													2
1	41							2																6		6															2
2	38	2	4	2	1	1	2	2	1	3	2	2	1	3	2	158	55	68	109/68			1	2					2
1	32							2										67	117/67				1	6		6							>1000	1			0.033	1	0.007	1	2	5.69	1
2	36							2										85	114/64			1	1	4	2	6															2
2	60							2										68	109/63			1	2	3		6							53.45	1							2
2	57							2										70	129/66	2		1	1	4	2	6							92.32	1			0.005	1	0.007	1	1
2	41	2	4	2	2	1	2	2	1	2	2	2	1	3	1	165	60	69	120/74			1	1	4	2	5							947.6	1					0.015	1	2
2	41	2	1	2	2	1	2	2	2	3	2	2	2	3	1	158	50	72	124/61				1	6		5	2						63.19	1							2
1	67	2	3	2	1	1	2	1	2	3		2	1		1	175	79	58	153/71				1	3	2	6													0.007	1	2
1	53	2	1	2	2	1	2	2	1	3		1	1		1	173	62	62	121/64				2	3	2	5	4												0.033	1	2
2	52	2	4	2	2	1	2	2	1	2	2	2	2	1	1	154	50	62	121/64			1	2			5							203	1							2
1	53	2	1	2	2	2	2	2	2	3		2	1		1	170	65	69	132/69				1	6				2					>1000	1					0.007	1	2
1	28							2										67	131/83									2					470.7	1							2
2	51							2										69	131/76			1	1	3	2	5							>1000	1							2
1	54							2										60	142/88				1	6	2	5	2						118.9	1					0.007	1	2
2	35							2										92	103/64	2		1	2					2					708.2	1							2
1	25							2
2	40	2	1	2	2	1	2	2	1	3	2	2	1	3	1	168	51	69	113/66	2		1	1																		2
2	41							2										76	121/64			1	2	6		6															2
2	71							2																3	2								15.18	1							2
2	48							2														1
2	43							2										70	93/54			1	1	4	2	6															2
1	62							2																3	2
2	58							2																3	2
2	29							2										75	97/62			2		6		6															2
2	40							2
2	38							2										75	112/63				1			6							66.82	1							2
2	37							2										101	111/72					6		6															2
2	52							2										64	107/53			1	1	4	2	5	3														2
2	57							2										62	148/81	1		1	2	3	2	5	4						89.65	1					0.006	1	2
1	75							2
1	43							2
2	54	2	1	1	2	1	2	1	1	2	1	2	1	3	1	168	62	65	125/65				1	6		6															2
2	50	2	1	2	2	2	2	2	1	3	2	2	2	3	1	164.5	61.5	62	136/72			1	1	4	2	5	3						34.47	1							2
1	45	2	1	2	2	1	2	1	1	2		1	1		1	178	102	80	122/68				2	3	2	5	2						>1000	1					0.006	1	2
1	47	2	1	2	2	2	2	1	2	3		2	1		1	180	102	91	151/97				1	6	2	5	2														2
1	34	2	1	2	2	2	2	1	2	3		1	1		1	181	72	72	131/78				1	5	2	5	3						188.5	1							2
2	58							2
1	52	2	1	2	2	1	2	1	1	2		1	2		1	171	84	62	96/63				1	3	2	5	4						363.4	1							2
2	29	2	1	2	1	1	2	2	1	2	2	2	2	3	1	158	44	101	121/75				1	6		6							541.8	1							2
2	37	2	1	2	2	2	2	2	2	3	2	2	2	3	2	159	51	85	101/58			1	2	6	2	6															2
2	33	2	4	2	2	1	2	2	1	3	2	2	2	3	2	157	47.5	90	111/71	1	1	1	1	6		6							826.4	1							2
1	74							2																																								52.78	1
1	64	2	1	2	2	1	1	1	1	3		1	1		1	173	75	54	140/64				2	3		5	4												0.006	1	2
1	31	2	1	2	2	2	2	2	2	3		1	1		1	183	79.9	75	128/75				1																		1
2	47							2
2	36							2
1	61	2	3	2	2	1	2	2	2	3		1	2		1	172	68	62	117/64				1	6	2	3	2						99.05	1							2
2	46							2
1	65							2										73	149/86				1	4	2	5	4						23.53	1							2
2	65							2										89	179/85			1	1	3	2	6							250.5	1					0.006	1	2
1	56	2	1	2	2	2	2	2	1	3		1	1		1	172	80.8	73	126/75				1	3	2	2	2						49.12	1			0.493	1	0.006	1	2	5.15	1
2	25	1	5	2	2	1	2	2	1	3	1	2	2	3	1	168	48.5	66	113/67			2	1	4	2	6							262.9	1							2
1	49							2										80	125/78				1	6		6							102.6	1					0.473	1	2
1	47							2										66	109/59				1	6	2	6							>1000	1					0.954	1	2
1	51							2										62	137/83				2	6	2	5	4						185	1					0.006	1	2
1	56							2										66	126/80				2	6		6							242.5	1					0.198	1	2
1	43							2																6									572.5	1					0.011	1	2
2	67							2										71	179/76			1	1	6	2	3	2						13.23	1							2
2	35							2										78	121/71			1							54.42	1			533.8	1							2
1	37							2																							745.4	1					0.002	1	0.006	1	2
1	60							2										65	150/81																		0.936	1	0.006	1	2
2	60							2										66	145/78														52.28	1			0.038	1	0.006	1	2
1	69							2										72	111/60																						2
2	42							2										85	111/66			1	1	3	2	6							62.81	1							2
1	28	1	1	2	2	1	2	2	2	3		2	2		1	173	82	73	109/68				1	6		6							560.1	1							2
2	38							2										70	123/73			1	1										460	1							2
2	44							2										78	128/89			1	1	6		6															2							40.7	1
1	48							2										61	119/68				1	5	2	6							187.7	1			0.102	1	0.006	1	2
1	38							2																																	2
1	49							2																																	2
2	47							2														1		4	2																2
2	69	2		2	2	1	2	2	1	3	2	2	2	1	1	159	56.5					1	1	4	2	6							99.3	1							2
2	42	2	4	2	2	1	2	1	1	3	2	2	2	3	1	155	60	80	107/62			1	1	4	2	6															2
1	67	2	3	2	1	2	2	2	2	3		1	2		1	170	68	59	149/66				1										483.7	1					0.04	1	2
1	34	2	4	2	2	2	2	1	2	3		2	2		2	174	95	82	148/102				2	5		6															2
1	55							2																6	2	5	3						135.2	1			0.429	1	0.006	1	2
1	59							2										67	135/91				2	3	2	6							18.41	1			0.368	1	0.006	1	2
2	59							2														1
2	38							2										67	102/61			1	2	4	2	6							978.6	1							2
2	35							2										88	127/75			1	1	4	2			2					>1000	1			0.256	1			2
1	38							2										78	115/65				1	3	2			2					506.6	1			0.002	1			2
1	48							2																6		6							186.5	1					0.501	1	2
2	49							2										66	114/67				1	6	2	6															2
1	37	1	1	2	2	1	2	2	2	3		1	1		2	170	82	67	114/62				1																		2
2	66	2	3	2	2	1	2	1	1	3	2	2	2	1	1	160	48	80	153/79			1	1	4	2	6															2
1	48	2	1	2	2	1	2	2	2	3		1	1		1	173	71	77	112/73				2	5	2	6															2
1	38							2																6		6							88.11	1							2
2	36	2	1	2	2	1	1	2	1	1	2	2	2	3	1	161	69	89	126/84				1	4	2	6							153.2	1							2
2	40							2														1																			2
1	77	2	3	2	2	1	2	1	1	3		2	2		1	168	67	74	172/90														15.89	1							2
1	25	1		2	2	1	2	2	1	3		2	1		1	182	93	69	114/66				1	5	2	6							400.8	1							2
2	35							2
1	47							2										61	111/63				1					2			1.97	1					0.005	1	0.006	1
2	27	2		2	2	1	2	2	2	3	2	2	2	3	1	166	50	117	115/80				1	6	2	5	4						398	1							2
2	27	2	4	2	2	1	2	2	1	3	2	2	1	3	1	170	52						2
2	50	2		2	2	1	2	2	1	3	2	2	2	3	1	160	53	74	134/67			1	1	6		6		2					>1000	1							2
2	67							2										73	145/90		1	1	1	6	2	5	3														2
2	63							2																									>1000	1			0.976	1	0.006	1	2
1	65	2	3	1	2	1	2	2	1	2		2	1		2	175	90	73	128/68				2	3	2	5	2														2
2	36	2	1	2	2	1	2	2	2	3	2	2	1	3	1	160	55						1			6							503	1							2
1	44	2	1	2	2	1	2	2	1	2		2	1		1	170	75	79	100/69				1
2	46	2	4	2	2	2	2	2	1	2	2	2	2	3	1	159	52	87	124/81	2		1	1	6		6							>1000	1			0.747	1	0.006	1	2
1	63							2																6		1	1	1					56.88	1			0.927	1	0.006	1	2	37.77	1	74.53	1			4176	1
2	41	2	4	1	1	1	2	2	1	3	2	2	2	3	1	161	60	66	103/63			1	1	6	2	6							459.4	1							2
2	56	2	3	2	1	1	2	1	1	3	2	2	2	1	1	160	62	68	108/66				2	4	2	6							>1000	1					0.01	1	2
1	60	2	3	2	2	1	2	2	2	3		1	1		1	165	67	60	120/70				1	6		6															2
2	35							2
2	58	2	3	2	2	1	2	2	1	3	2	2	2	1	2	162	66	69	138/83		1	1	1	3	2	6							132.4	1			0.275	1	0.006	1	2					27.47	1
1	65							2
2	47							2														1		4		6							>1000	1					0.782	1	2
2	33							2																6															0.007	1	2
2	55							2														1											>1000	1
1	48							2
1	50							2																4		5							46.92	1							2
[truncated: 28 more columns]
